# Supplementary material for: Enhanced duplex- and triplex-forming ability and enzymatic resistance of oligodeoxynucleotides modified by a tricyclic thymine derivative
Source: Royal Society of Chemistry journal article supplement (doi:10.1039/d1ob01462e), 2021-01-01
Supplement: d1ob01462e1.pdf [file d1ob01462e1.pdf]

## Organic & Biomolecular Chemistry

### Supporting Information

#### Enhanced Duplex- and Triplex-forming Ability and Enzymatic Resistance of Oligodeoxynucleotides Modified by a Tricyclic Thymine Derivative

Yuki Kishimoto,<sup>a,b</sup> Akane Fujii,<sup>a,b</sup> Osamu Nakagawa<sup>\*a,b,c</sup> and Satoshi Obika<sup>\*a,b</sup>

<sup>a</sup> Graduate School of Pharmaceutical Sciences, Osaka University, 1-6 Yamadaoka, Suita, Osaka 565-0871, Japan.

<sup>b</sup> Core Research for Evolutional Science and Technology (CREST), Japan Sciences and Technology Agency (JST), 7 Gobancho, Chiyoda-ku, Tokyo 102-0076, Japan.

<sup>c</sup> Faculty of Pharmaceutical Sciences, Tokushima Bunri University, Nishihamaoji, Yamashiro-cho, Tokushima 770-8514, Japan

E-mail: obika@phs.osaka-u.ac.jp (S.Obika), osamu\_nakagawa@ph.bunri-u.ac.jp (O. Nakagawa)

#### Contents:

|                                                                                                        |         |
|--------------------------------------------------------------------------------------------------------|---------|
| ➤ <b>Fig. S1</b>                                                                                       | S2-S6   |
| <sup>1</sup> H-NMR, <sup>13</sup> C-NMR, <sup>31</sup> P-NMR spectra of each compound.                 |         |
| ➤ <b>Fig. S2</b>                                                                                       | S7      |
| Absorption spectrum of OBN nucleoside <b>6</b> .                                                       |         |
| ➤ <b>Table S1</b>                                                                                      | S7      |
| Absorption data of OBN nucleoside <b>6</b> .                                                           |         |
| ➤ <b>Table S2</b>                                                                                      | S8      |
| Sequence and MALDI-TOF-Mass data of OBN-modified ODNs.                                                 |         |
| ➤ <b>Fig. S3</b>                                                                                       | S9-S12  |
| HPLC chart of oligodeoxynucleotides (ODNs) containing OBN ( <b>B</b> ).                                |         |
| ➤ <b>Fig. S4</b>                                                                                       | S12-S20 |
| MALDI-TOF mass spectrometry data obtained for ODNs containing OBN ( <b>B</b> ).                        |         |
| ➤ <b>Fig. S5</b>                                                                                       | S21-S24 |
| UV melting curves for the duplexes containing OBN ( <b>B</b> ).                                        |         |
| ➤ <b>Fig. S6</b>                                                                                       | S24     |
| UV melting curves for the duplexes containing OBN ( <b>B</b> ) with matched and mismatched base pairs. |         |
| ➤ <b>Fig. S7</b>                                                                                       | S25     |
| Fluorescent spectrum of OBN-modified ODN2 (5'-d(GCGTTBTTTGCT)-3').                                     |         |
| ➤ <b>Fig. S8</b>                                                                                       | S25-S28 |
| UV melting curves for the triplexes containing TFO2-8.                                                 |         |
| ➤ <b>Fig. S9</b>                                                                                       | S28     |
| Snapshots of molecular dynamics (MD)                                                                   |         |
| ➤ <b>Fig. S10</b>                                                                                      | S29     |
| Hysteresis of sigmoidal curve in TFO/dsDNA                                                             |         |



(b)  $^1\text{H-NMR}$  ( $\text{DMSO-}d_6$ ) of compound 3

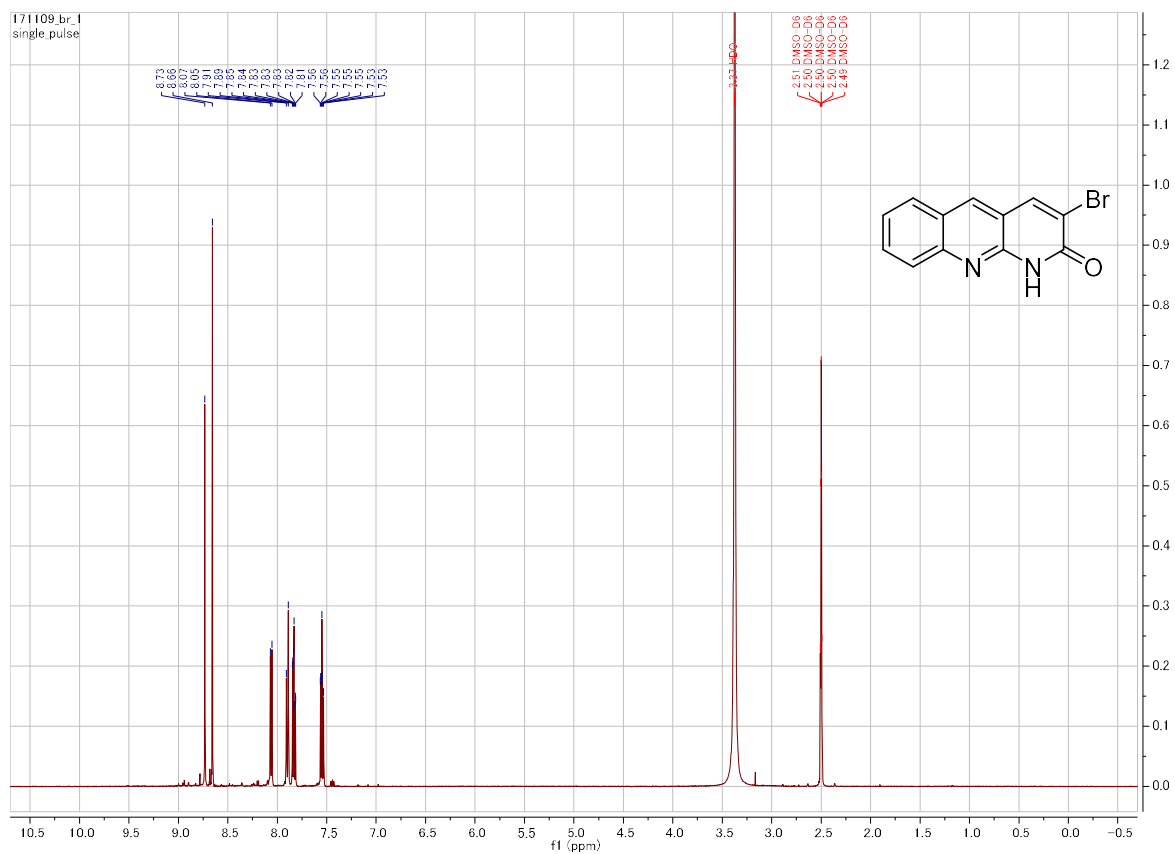

$^{13}\text{C-NMR}$  ( $\text{DMSO-}d_6$ ) of compound 3

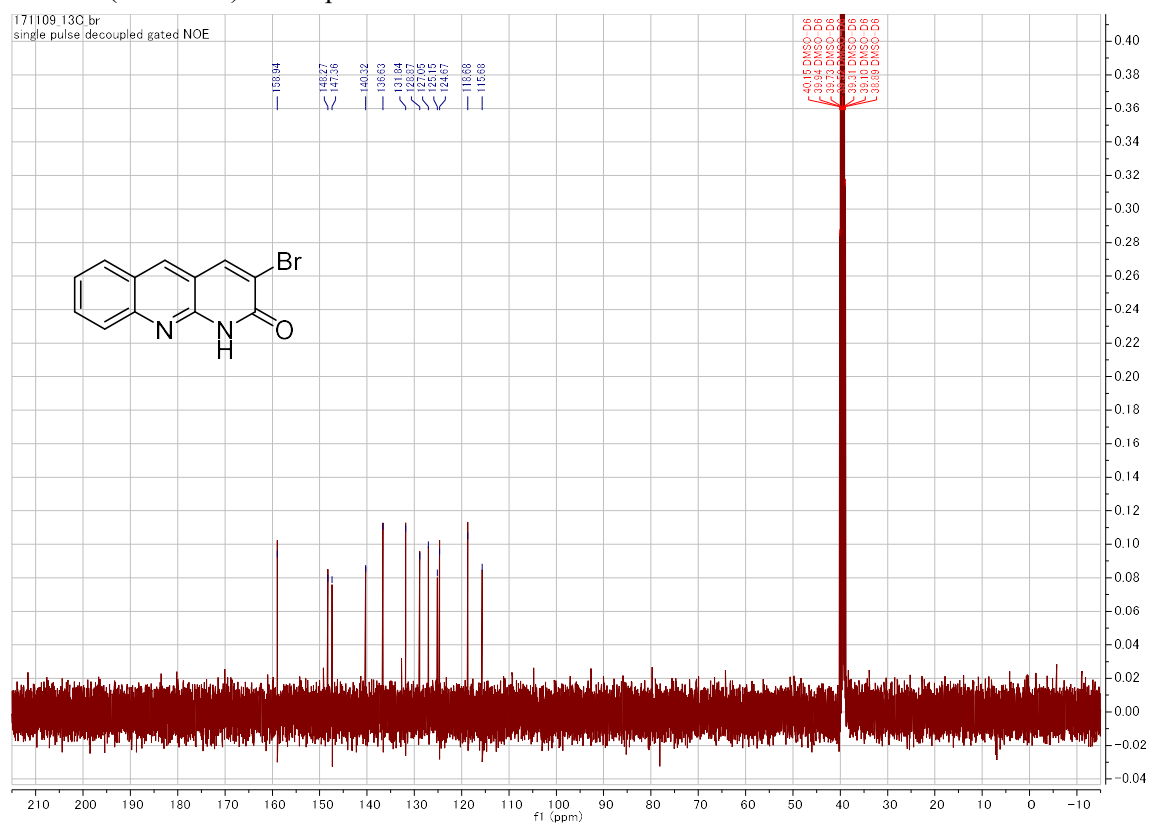

(c)  $^1\text{H-NMR}$  ( $\text{CD}_3\text{OD}$ ) of compound **6**

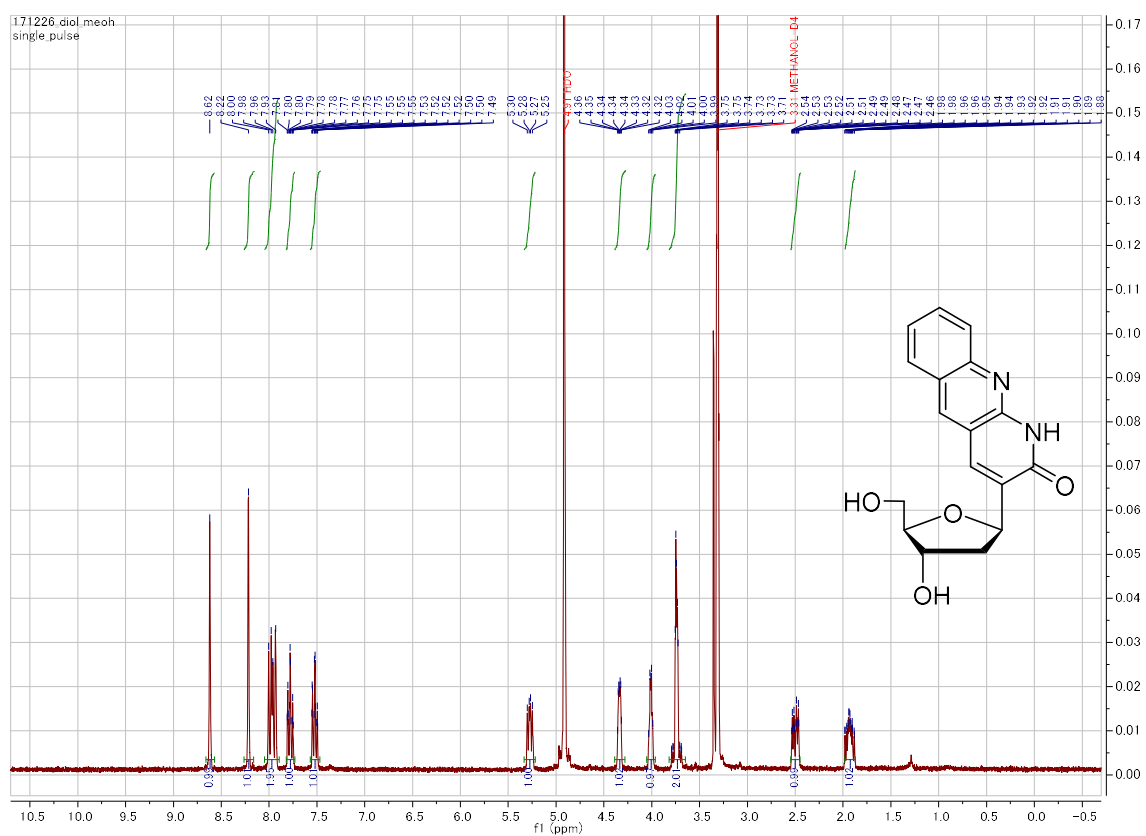

$^{13}\text{C-NMR}$  ( $\text{CD}_3\text{OD}$ ) compound **6**

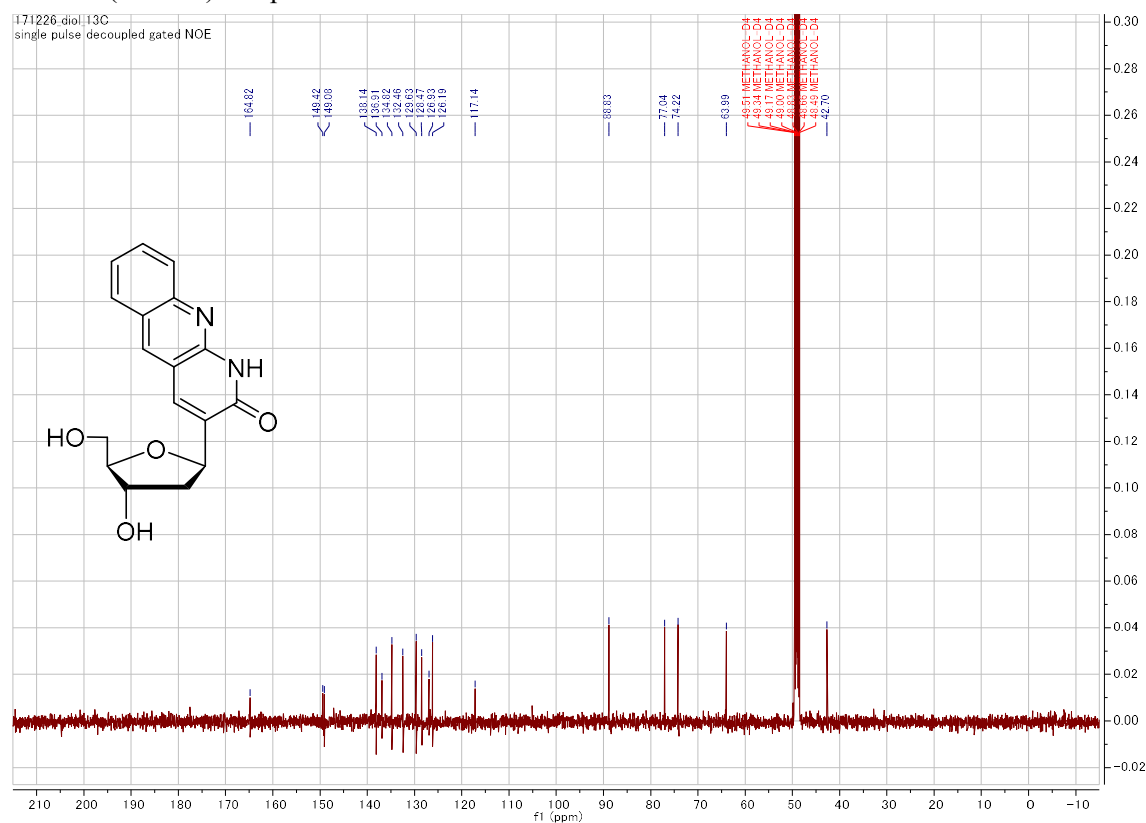





**Fig. S2** Absorption spectrum of OBN nucleoside **6**.

OBN nucleoside **6** was dissolved in water containing 0.1% (v/v) of DMSO at 25 $\mu$ M (final concentration). The absorption spectrum was measured by UV-1800 spectrometers (SHIMADZU).

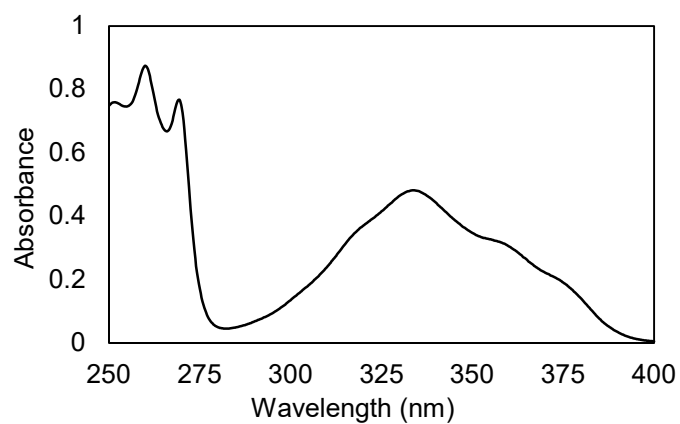

**Table S1** Absorption data of OBN nucleoside **6**.

Molar Absorptivity (L/(mol·cm)) was calculated according Lambert-Beer law based on each absorption maximum picked up from Fig S2.

| Absorption maximum (nm) | Molar Absorptivity (L/(mol·cm)) |
|-------------------------|---------------------------------|
| 260                     | 30,000                          |
| 269                     | 26,000                          |
| 334                     | 16,000                          |

**Table S2** Sequence and MALDI-TOF-Mass data of OBN-modified ODNs.

| Sequence                                          | MALDI-TOF-Mass [M-H] <sup>-</sup> |        |
|---------------------------------------------------|-----------------------------------|--------|
|                                                   | Calcd.                            | Found  |
| ODN2: 5'-d(GCGTT <b>B</b> TTTGCT)-3'              | 3702.5                            | 3703.8 |
| ODN3: 5'-d(GCGT <b>B</b> TBTGCT)-3'               | 3772.6                            | 3772.7 |
| ODN4: 5'-d(GCGTT <b>B</b> BTTGCT)-3'              | 3772.6                            | 3772.4 |
| ODN5: 5'-d(GCGB <b>T</b> BTBTGCT)-3'              | 3842.7                            | 3843.4 |
| ODN6: 5'-d(GCGT <b>B</b> BBTTGCT)-3'              | 3842.7                            | 3843.8 |
| ODN8: 5'-d(GCGTC <b>B</b> ATTGCT)-3'              | 3696.5                            | 3697.3 |
| ODN10: 5'-d(GCGTC <b>B</b> CTTGCT)-3'             | 3672.5                            | 3673.5 |
| ODN12: 5'-d(GCGT <b>A</b> BATTGCT)-3'             | 3720.5                            | 3722.4 |
| ODN14: 5'-d(GCGT <b>G</b> BGTTGCT)-3'             | 3752.5                            | 3753.2 |
| TFO2: 5'-d(TTTTT <b>C</b> T <b>B</b> TCTCTCT)-3'  | 4566.1                            | 4567.3 |
| TFO3: 5'-d(TTTTT <b>C</b> TTTCTCTCT)-3'           | 4566.1                            | 4565.0 |
| TFO4: 5'-d(TTTTT <b>C</b> BTCTCTCT)-3'            | 4566.1                            | 4565.6 |
| TFO5: 5'-d(TTTTT <b>B</b> CBTTCTCTCT)-3'          | 4636.2                            | 4638.8 |
| TFO6: 5'-d(TTTTT <b>B</b> CTT <b>B</b> CTCTCT)-3' | 4636.2                            | 4636.6 |
| TFO7: 5'-d(TTTTT <b>C</b> T <b>B</b> BCTCTCT)-3'  | 4636.2                            | 4637.0 |
| TFO8: 5'-d(TTTTT <b>C</b> BBBCTCTCT)-3'           | 4706.3                            | 4706.8 |
| ODN18: 5'-d(TTTTTTTTT <b>B</b> )-3'               | 3049.1                            | 3049.0 |

**B** = OBN, **C** = 2'-deoxy-5-mehtylcytidine



**Fig. S3** HPLC chart of oligodeoxynucleotides (ODNs) containing OBN (**B**).

HPLC conditions: Detection: UV 260 nm, flow rate: 1.0 mL/min, mobile Phase (A): 0.1 M TEAA (pH 7.0), (B): acetonitrile (ACN), column: waters XBridge™ OST C18 2.5μm (4.6×50 mm), temperature: 50 °C.

(**B**: OBN, **C**: 2'-deoxy5-methylcytidine)

(a) 5'-d(GCGTT**B**TTTGCT)-3' (ODN2)

[B conc. ACN: 7-13% (20 min)]

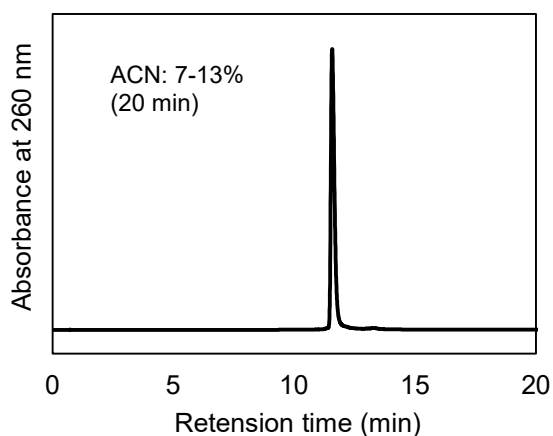

(b) 5'-d(GCGT**B**TBTGCT)-3' (ODN3)

[B conc. ACN: 9-15% (20 min)]

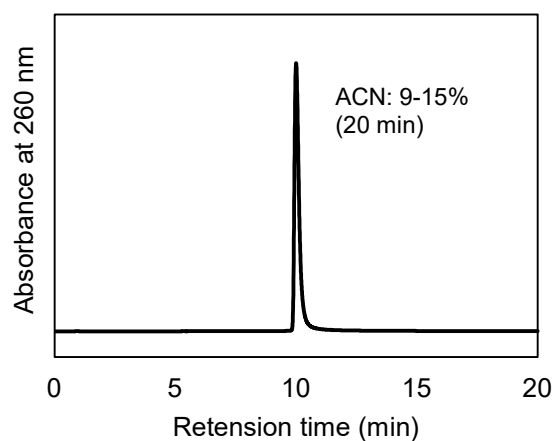

(c) 5'-d(GCGTT**B**BTTGCT)-3' (ODN4)

[B conc. ACN: 9-15% (20 min)]

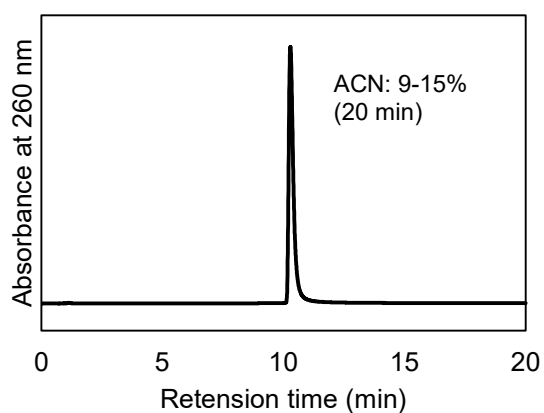

(d) 5'-d(GCG**B**TBTBTGCT)-3' (ODN5)

[B conc. ACN: 10-15% (20 min)]

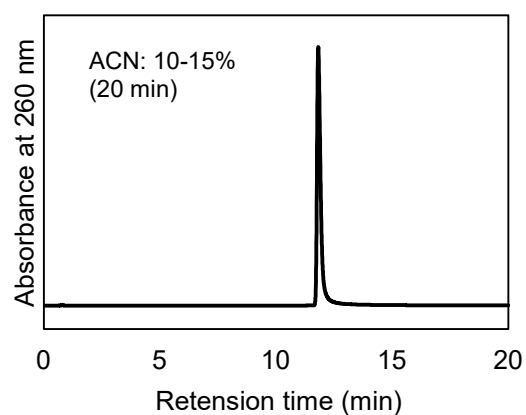

(e) 5'-d(GCGT**BBB**TTGCT)-3'

[B conc. ACN: 11-16% (20 min)]

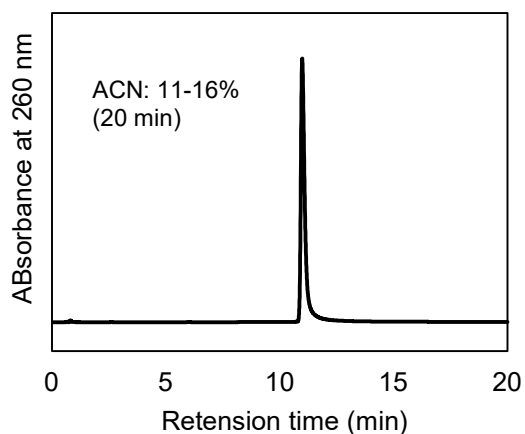

(f) 5'-d(GCGTC**B**AGTTGCT)-3' (ODN8)

[B conc. ACN: 6-12% (20 min)]

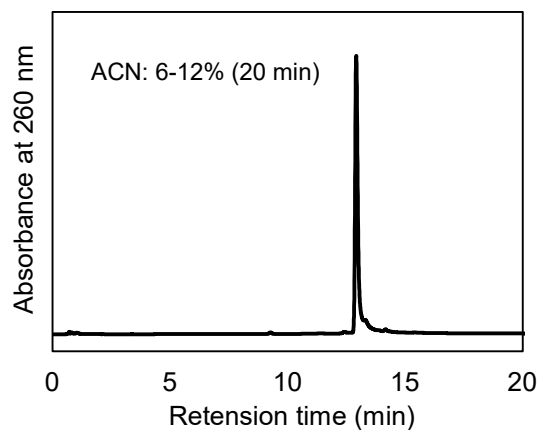

(g) 5'-d(GCGTC**B**CTTGCT)-3' (ODN10)

[B conc. ACN: 6-12% (20 min)]

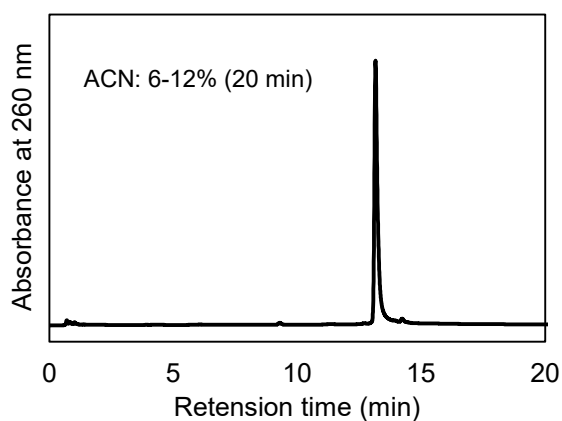

(h) 5'-d(GCGA**B**ATGCT)-3' (ODN12)

[B conc. ACN: 6-12% (20 min)]

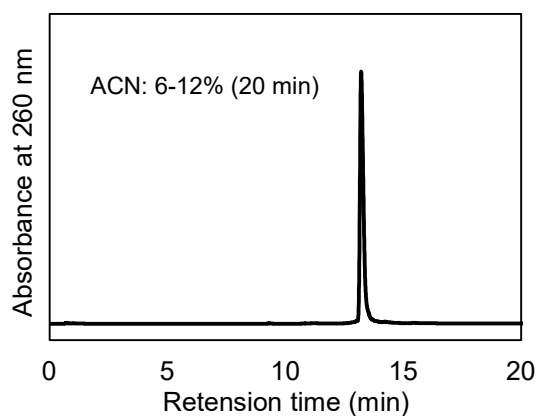

(i) 5'-d(GCGTG**B**GTTGCT)-3' (ODN14)

[B conc. ACN: 6-12% (20 min)]

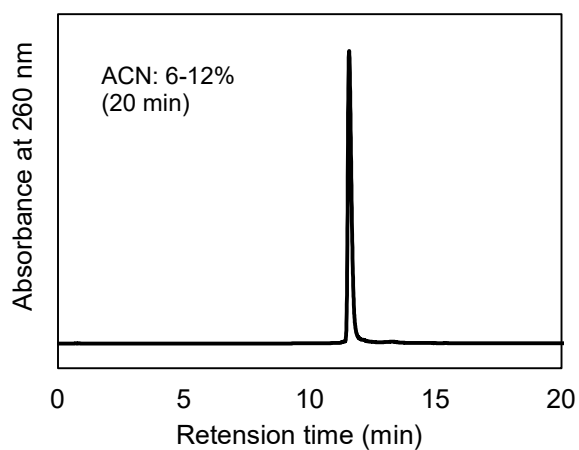

(j) 5'-d(TTTTTCT**B**TCTCTCT)-3' (TFO2)

[B conc. ACN: 9-14% (20 min)]

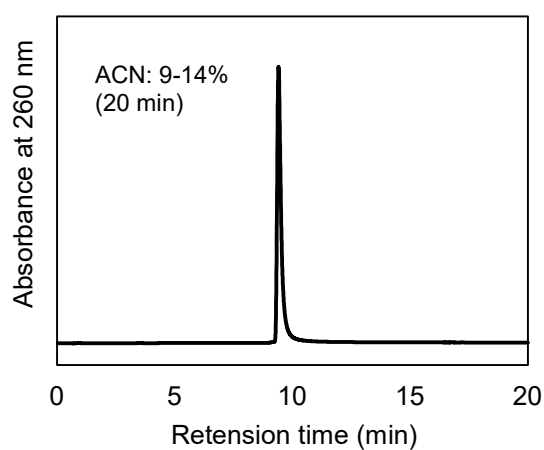

(k) 5'-d(TTTT**B**CTTTCTCTCT)-3' (TFO3)

[B conc. ACN: 9-18% (20 min)]

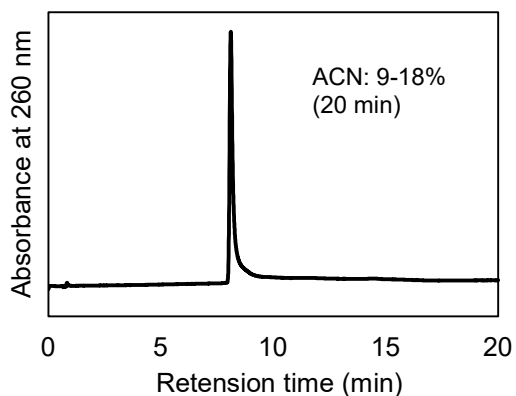

(l) 5'-d(TTTTTC**B**TTCTCTCT)-3' (TFO4)

[B conc. ACN: 9-18% (20 min)]

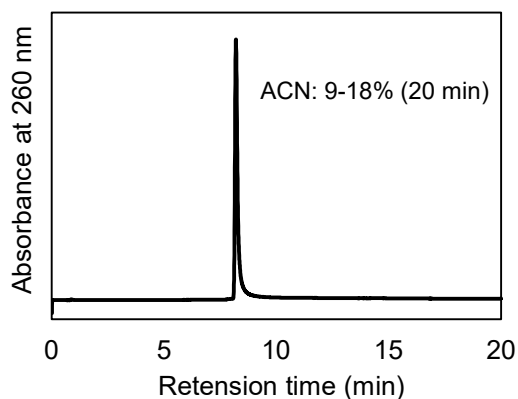

(m) 5'-d(TTTT**B**C**B**TTCTCTCT)-3' (TFO5)

[B conc. ACN: 9-18% (20 min)]

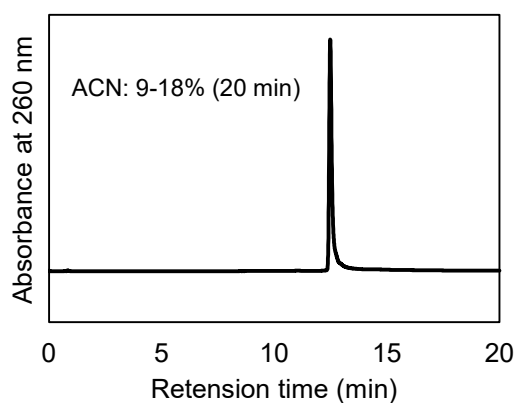

(n) 5'-d(TTTT**B**CTT**B**CTCTCT)-3' (TFO6)

[B conc. ACN: 9-18% (20 min)]

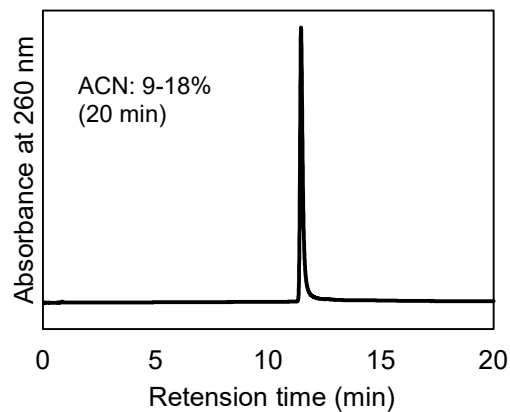

(o) 5'-d(TTTTTC**B**BTCTCTCT)-3' (TFO7)

[B conc. ACN: 9-18% (20 min)]

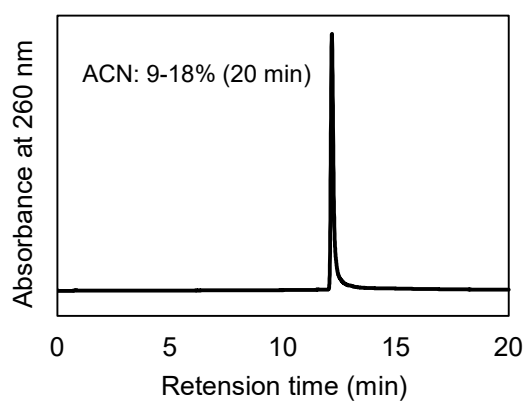

(p) 5'-d(TTTTTC**B**BBCTCTCT)-3' (TFO8)

[B conc. ACN: 9-18% (20 min)]

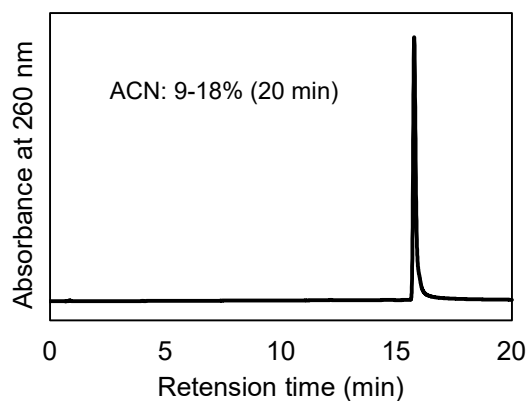

(q) 5'-d(TTTTTTTT**B**)-3' (ODN**18**)

[B conc. ACN: 9-18% (20 min)]

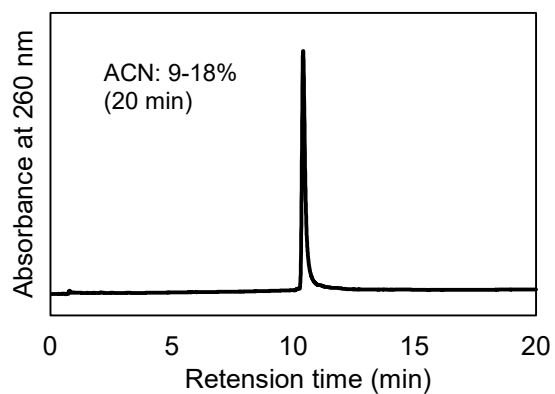

**Fig. S4** MALDI-TOF mass spectrometry data obtained for ODNs containing OBN (**B**).

(a) ODN2: 5'-d(GCGTT**B**TTTGCT)-3' (**B**: OBN)

[calcd. (M-H)<sup>-</sup>: 3702.5, found: 3703.8]

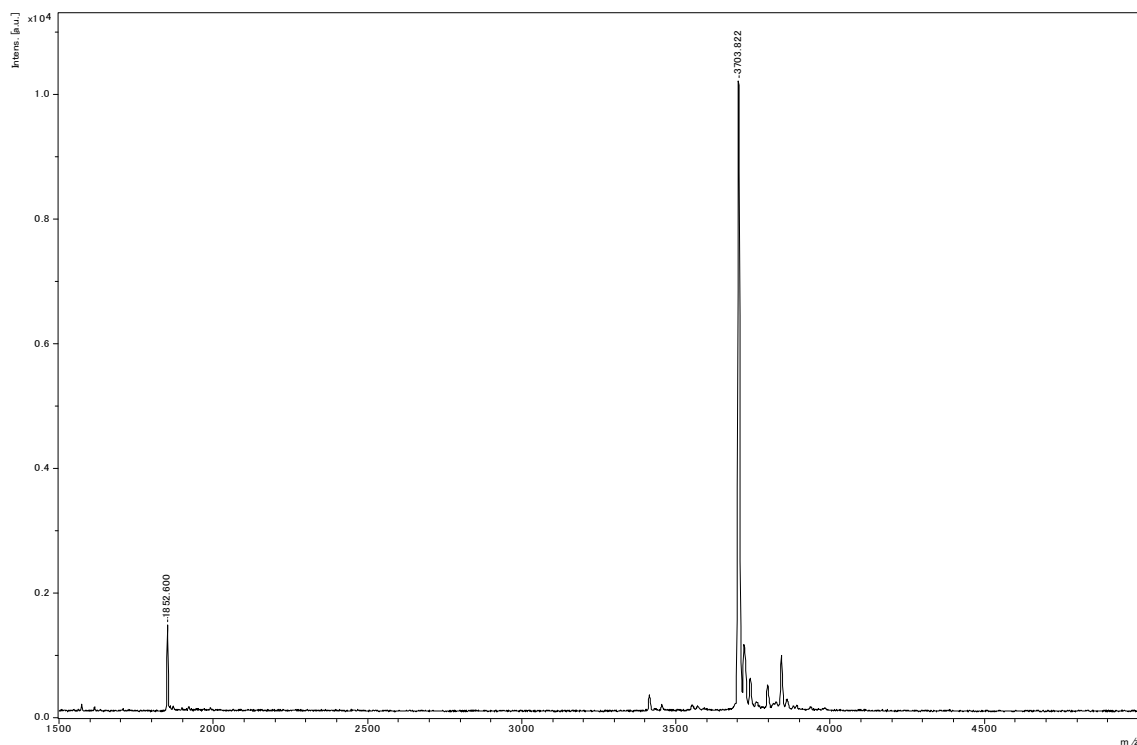

(b) ODN3: 5'-d(GCGT**B**TBTGCT)-3' (B: OBN)

[calcd. (M-H)<sup>-</sup>: 3772.6, found: 3772.7]

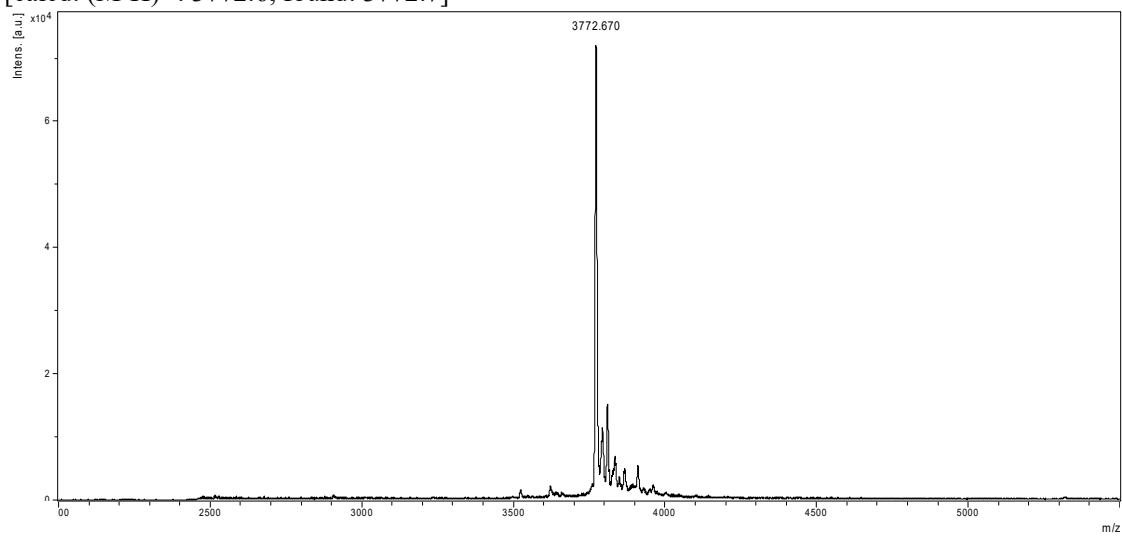

(c) ODN4: 5'-d(GCGTT**B**BTTGCT)-3' (B: OBN)

[calcd. (M-H)<sup>-</sup>: 3772.6, found: 3772.4]

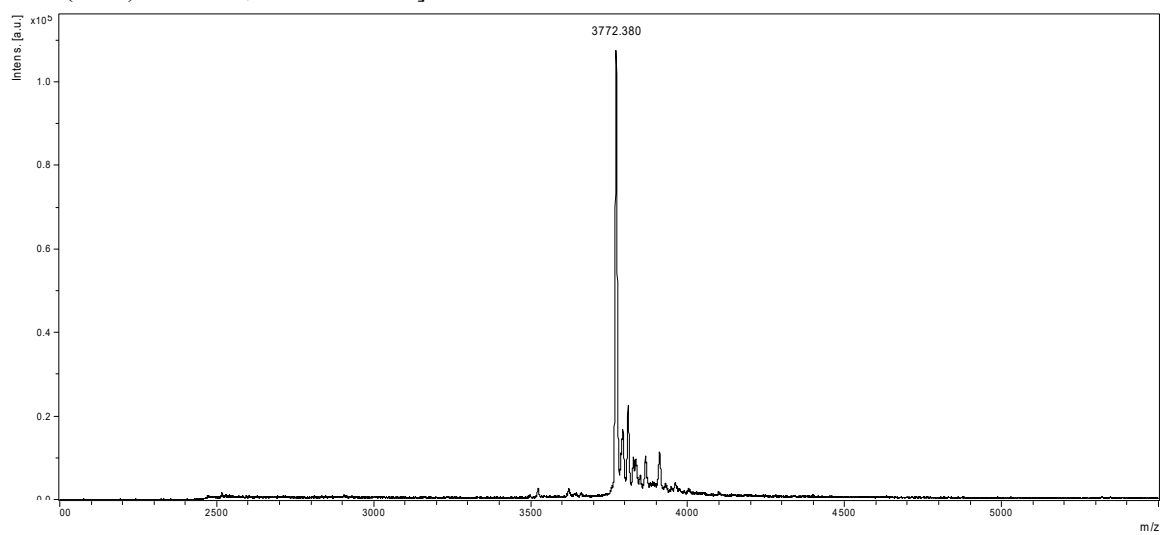

(d) ODN5: 5'-d(GCG**B**T**B**T**B**TGCT)-3' (B: OBN)

[calcd. (M-H)<sup>-</sup>: 3842.7, found: 3843.4]

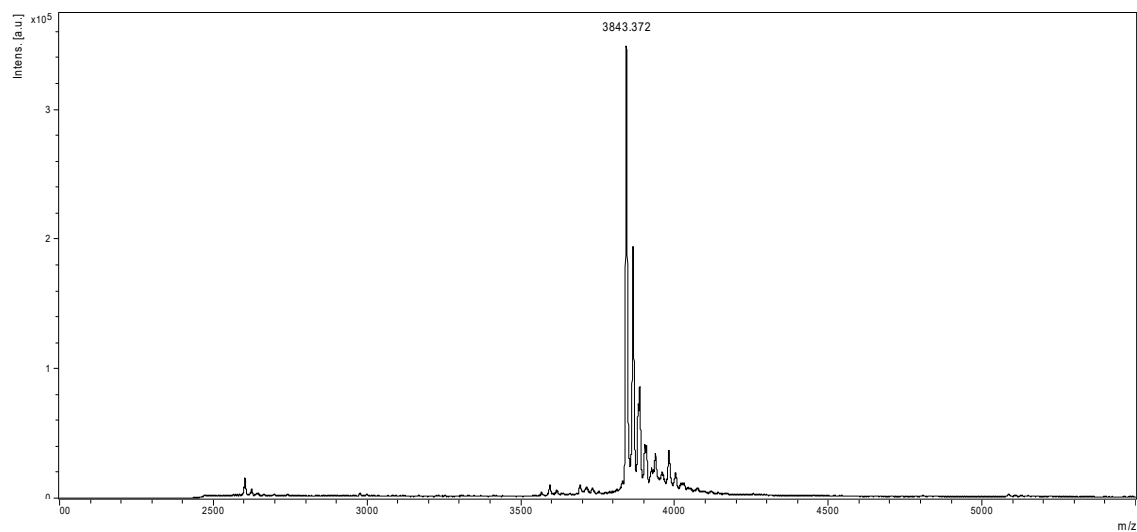

(e) ODN6: 5'-d(GCGT**B**B**B**TGCT)-3' (B: OBN)

[calcd. (M-H)<sup>-</sup>: 3842.7, found: 3843.8]

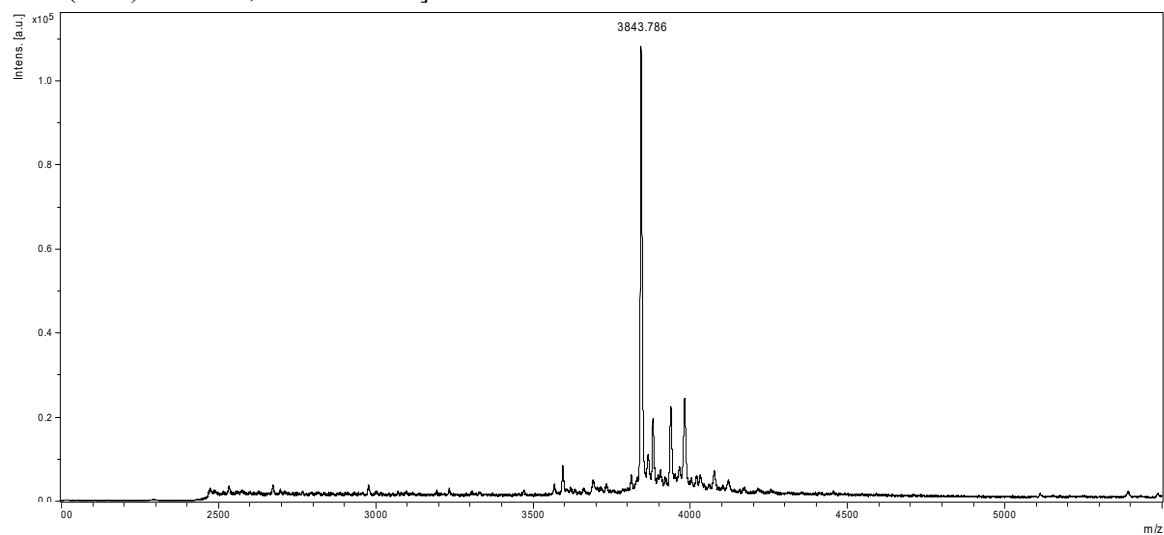

(f) ODN8: 5'-d(GCGTC**B**ATTGCT)-3' (B: OBN)

[calcd. (M-H)<sup>-</sup>: 3696.5, found: 3697.3]

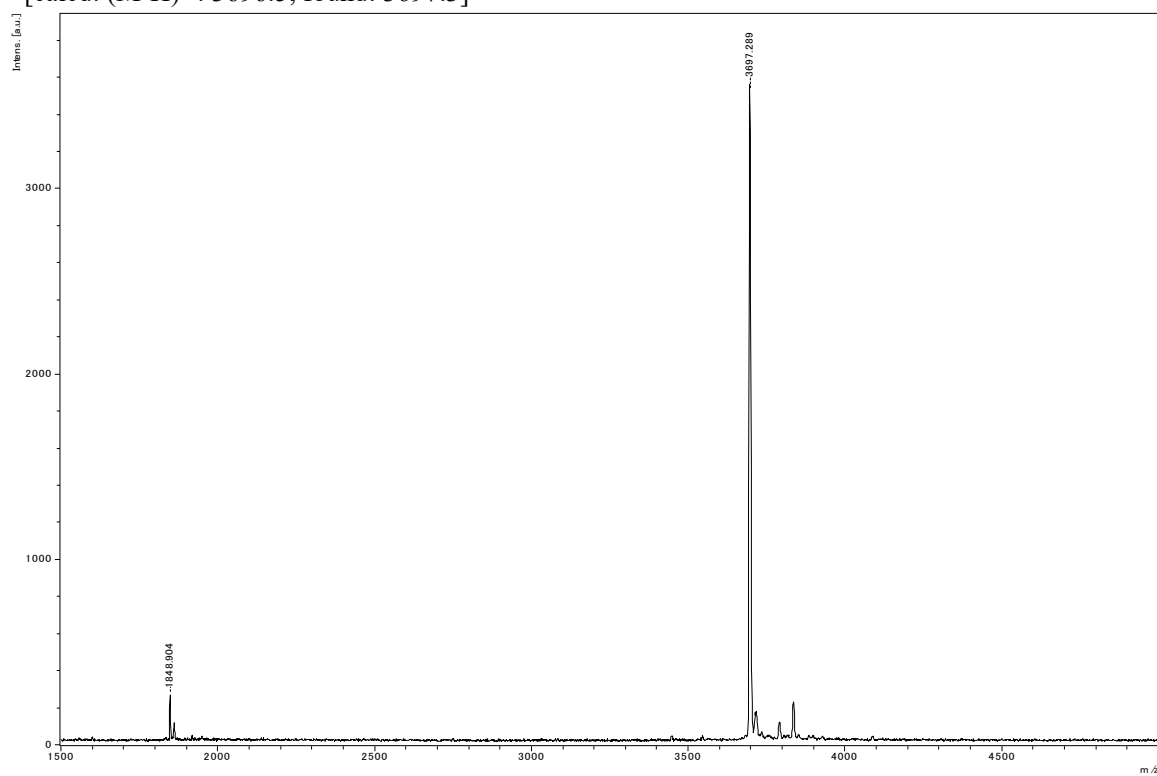

(g) ODN10: 5'-d(GCGTC**B**CTTGCT)-3' (B: OBN)

[calcd. (M-H)<sup>-</sup>: 3672.5, found: 3673.5]

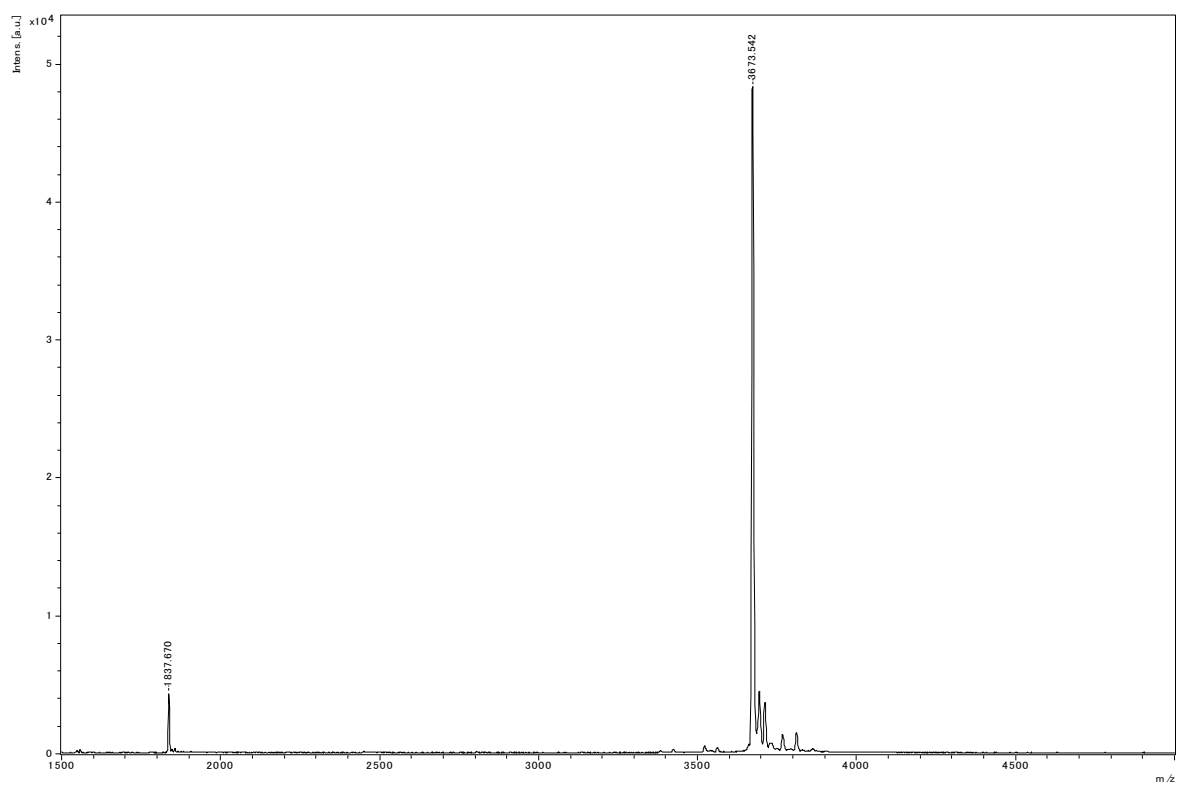

(h) ODN12: 5'-d(GCGT**A**BATTGCT)-3' (B: OBN)

[calcd. (M-H)<sup>-</sup>: 3720.5, found: 3722.4]

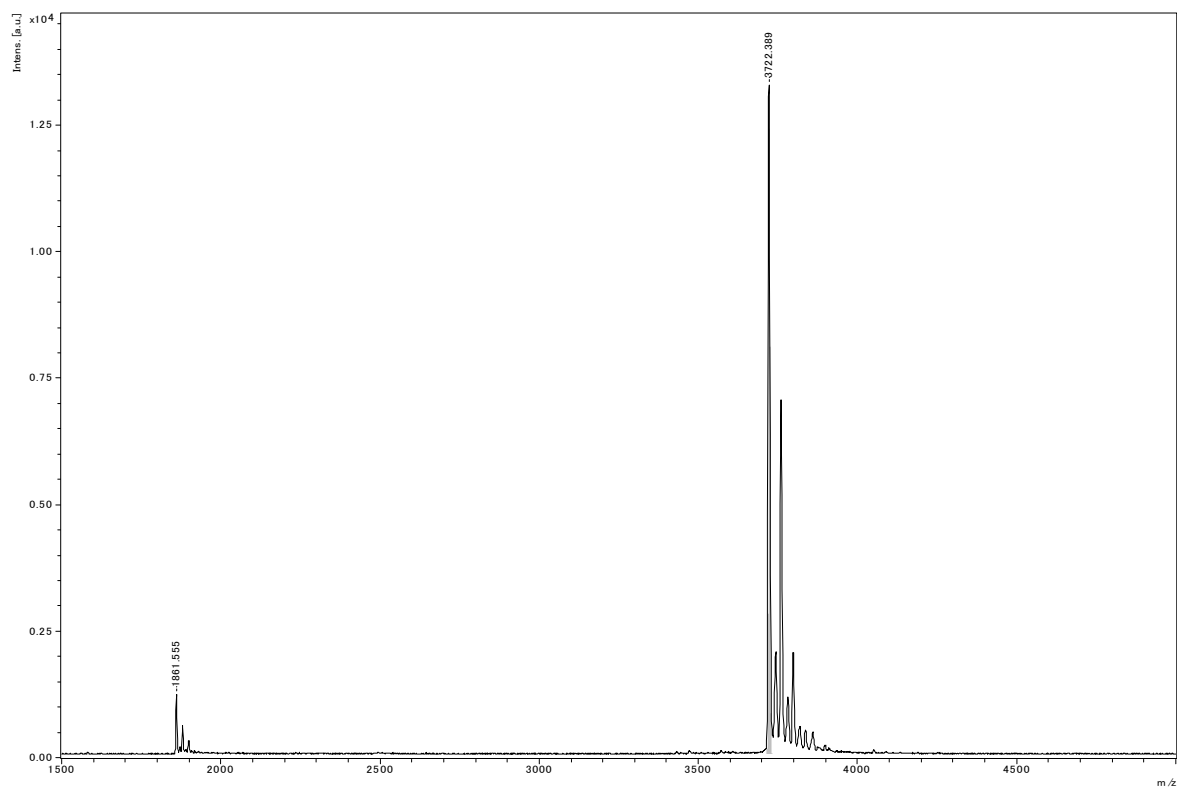

(i) ODN14: 5'-d(GCGT**G**BGTTGCT)-3' (B: OBN)

[calcd. (M-H)<sup>-</sup>: 3752.5, found: 3753.2]

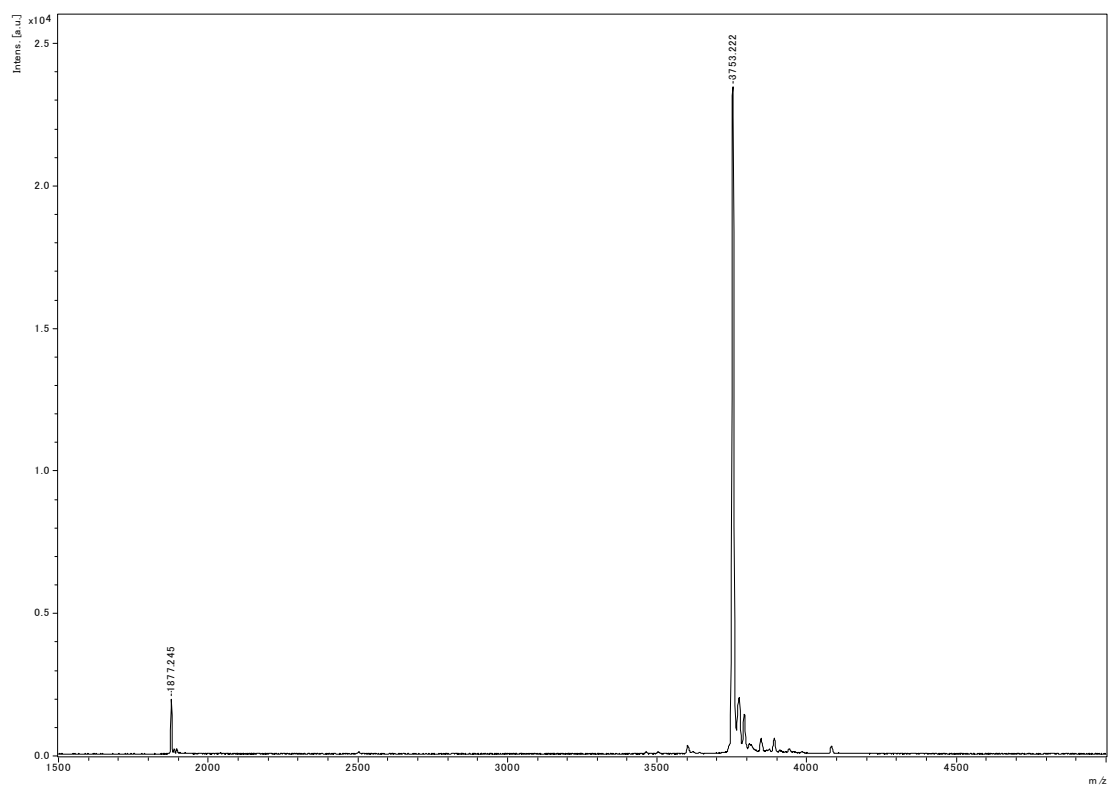



(j) TFO2: 5'-d(TTTTCTBTCTCTCT)-3' (**B**: OBN, **C**: 2'-deoxy5-methylcytidine)

[calcd. (M-H)<sup>-</sup>: 4566.1, found: 4567.3]

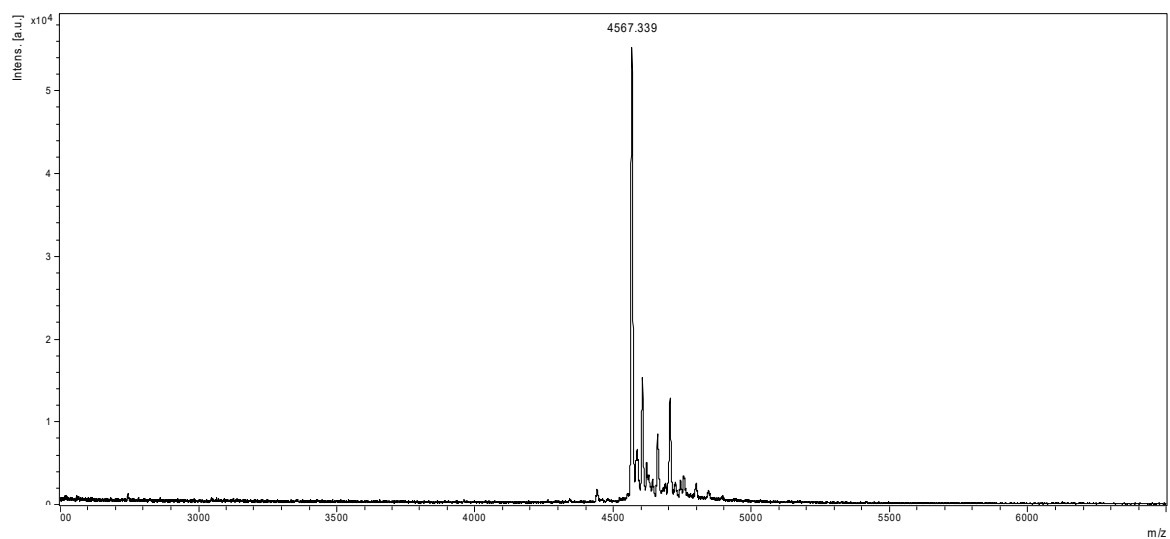

(k) TFO3: 5'-d(TTTTBCTTTCTCTCT)-3' (**B**: OBN, **C**: 2'-deoxy5-methylcytidine)

[calcd. (M-H)<sup>-</sup>: 4566.1, found: 4565.0]

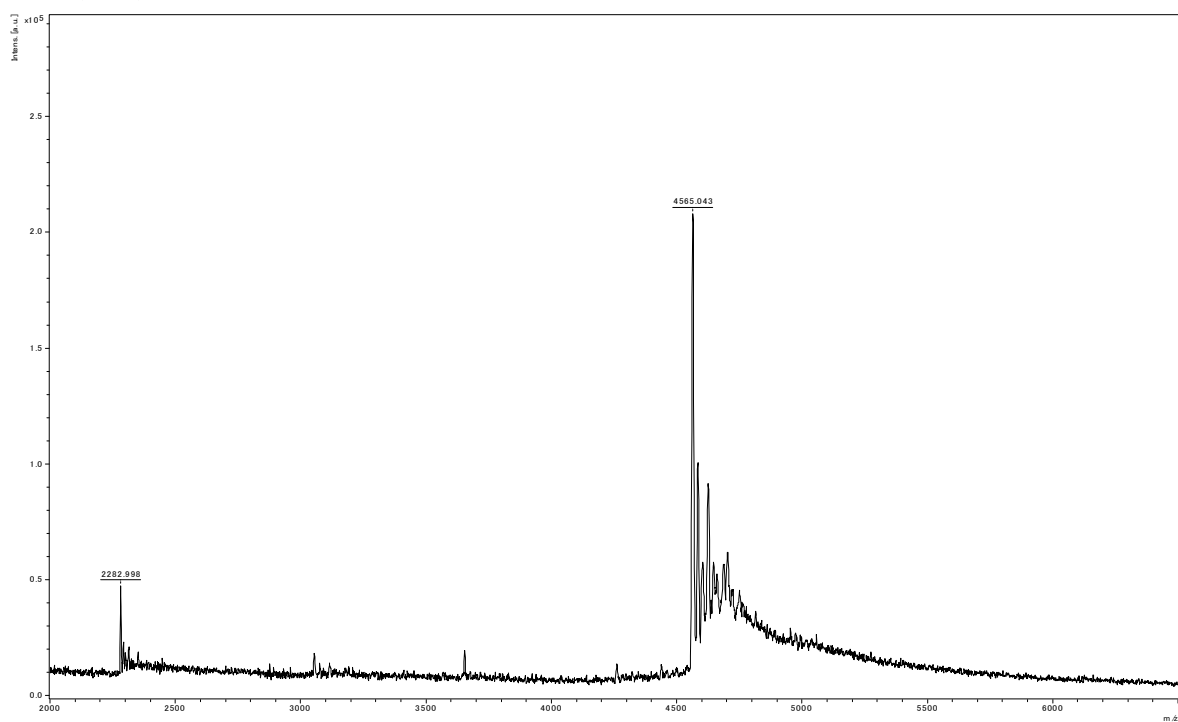

(l) TFO4: 5'-d(TTTTTCBTTCTCTCTCT)-3' (**B**: OBN, **C**: 2'-deoxy-5-methylcytidine)

[calcd. (M-H)<sup>-</sup>: 4566.1, found: 4565.6]

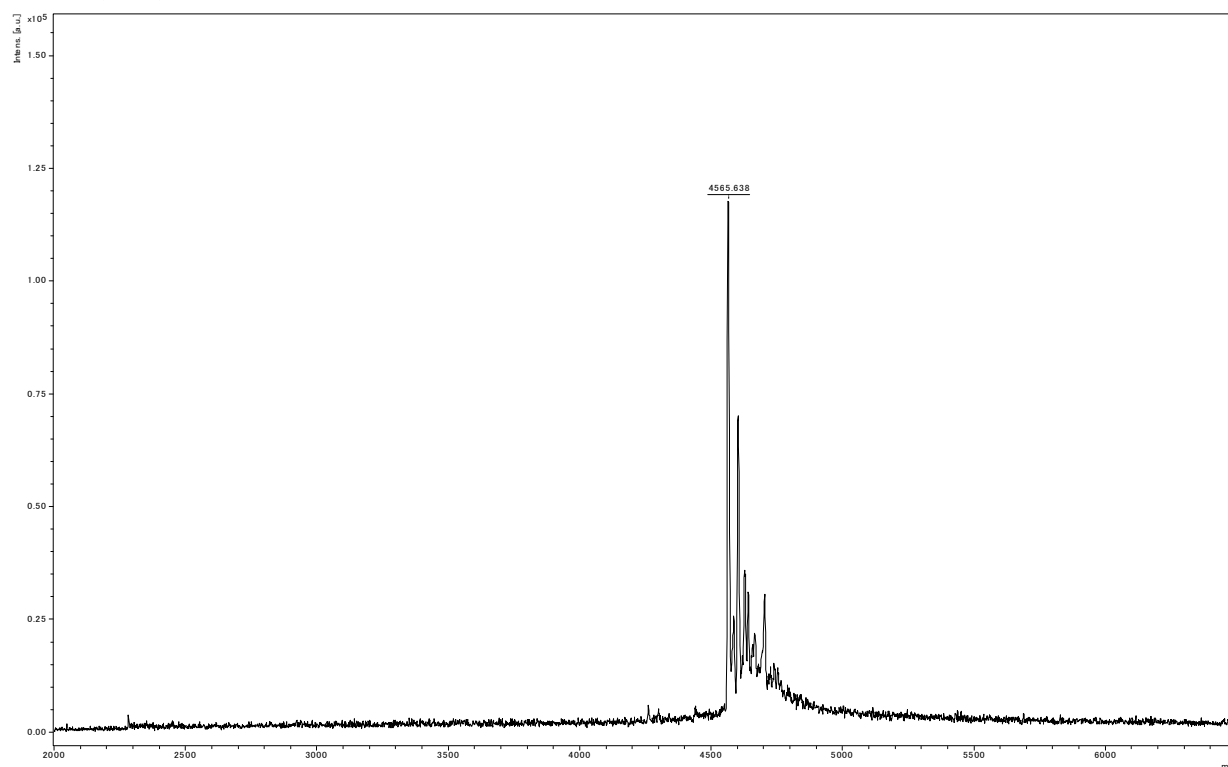

(m) TFO5: 5'-d(TTTTBCBTTCTCTCTCT)-3' (**B**: OBN, **C**: 2'-deoxy-5-methylcytidine)

[calcd. (M-H)<sup>-</sup>: 4636.2, found: 4638.8]

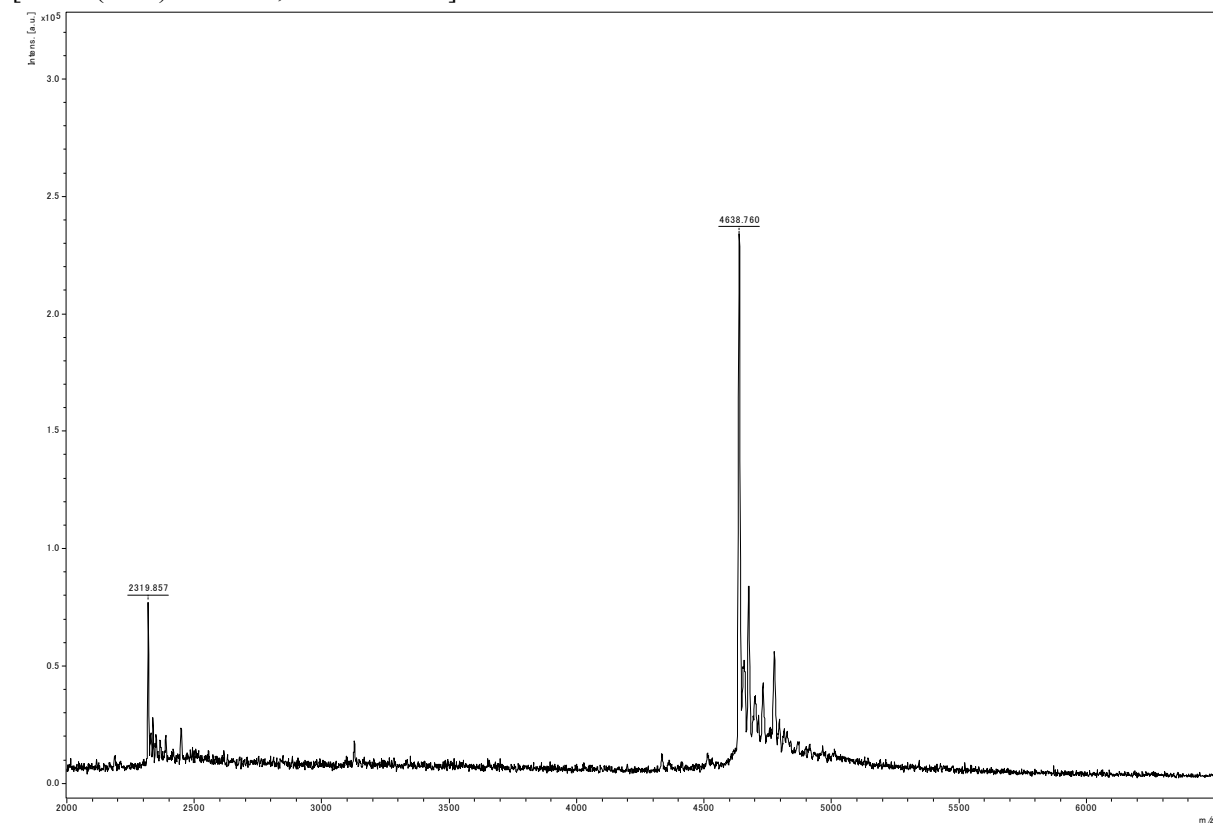

(n) TFO6: 5'-d(TTTTBCTTBCTCTCT)-3' (**B**: OBN, **C**: 2'-deoxy-5-methylcytidine)

[calcd. (M-H)<sup>-</sup>: 4636.2, found: 4636.6]

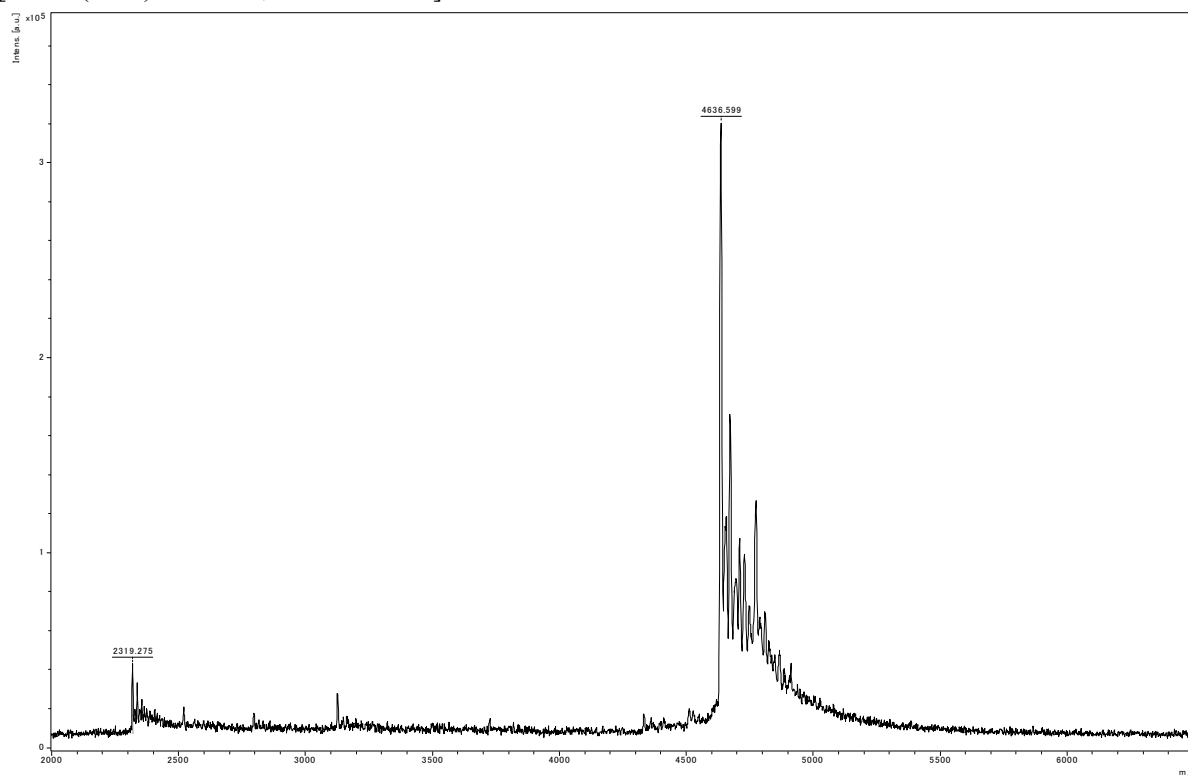

(o) TFO7: 5'-d(TTTTT**C**BBTCTCTCT)-3' (**B**: OBN, **C**: 2'-deoxy-5-methylcytidine)

[calcd. (M-H)<sup>-</sup>: 4636.2, found: 4637.0]

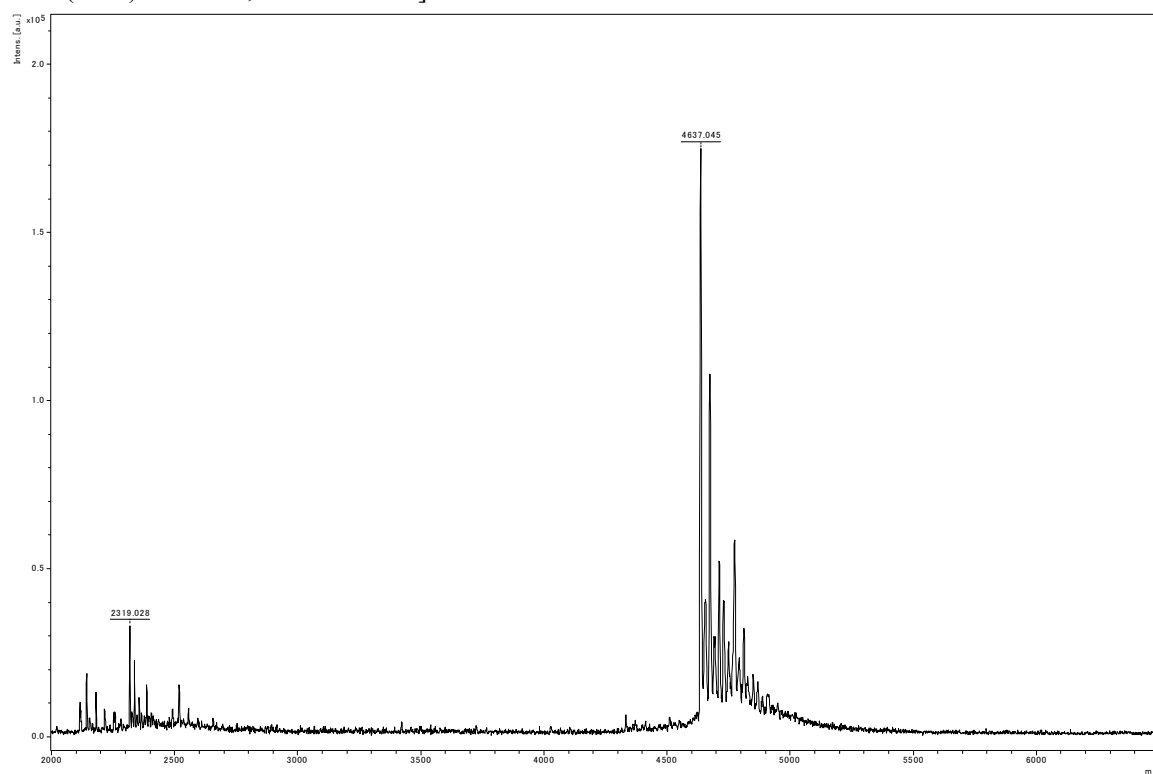

(p) TFO8: 5'-d(TTTTTCBBBCTCTCT)-3' (**B**: OBN, **C**: 2'-deoxy-5-methylcytidine)

[calcd. (M-H)<sup>-</sup>: 4706.3, found: 4706.8]

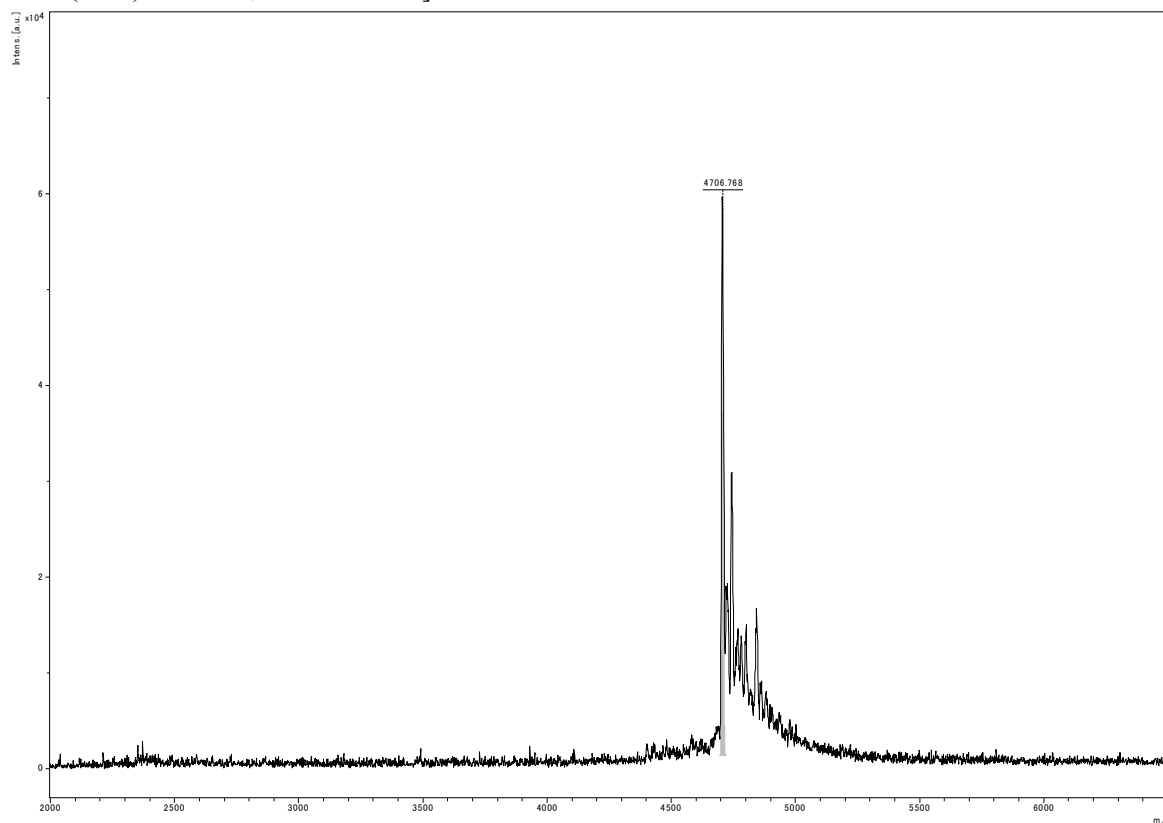

(q) ODN18: 5'-d(TTTTTTTTTTB)-3' (**B**: OBN)

[calcd. (M-H)<sup>-</sup>: 3049.1, found: 3049.0]

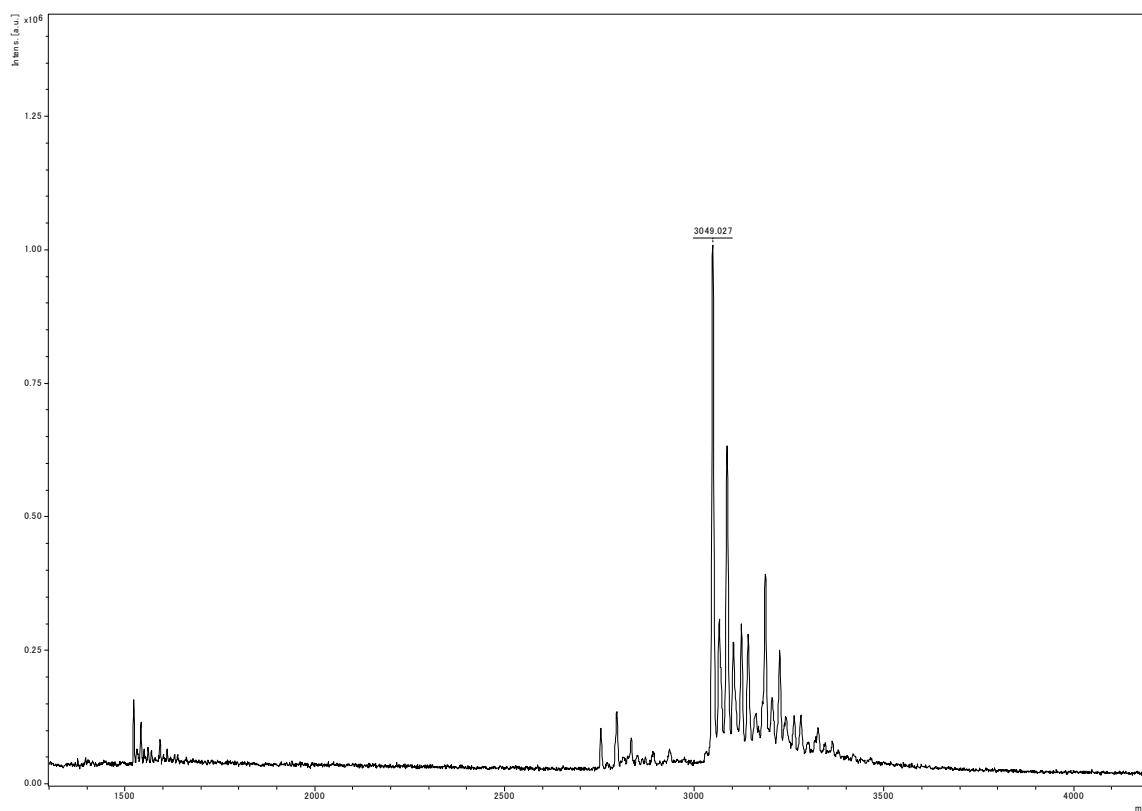

**Fig. S5** UV melting curves for the duplexes containing OBN (**B**).

UV melting profiles were measured in 2 mM sodium phosphate buffer (pH 7.2) containing 20 mM NaCl at a scan rate of 0.5°C/min at 260 nm. The concentration of oligonucleotide used was 2 μM for each strand. The error in  $T_m$  values was  $\pm 0.5^\circ\text{C}$ .

Sequence: 5'-d(GCGNNNNNTGCT)-3'/3'-CGCA**QAQA**ACGA-5'

(**N**: A, C, T, G or **B** (=OBN), **Q**: Corresponding matching base (A, C, T (or U), or G)).

(a) 5'-d(GCGTT**B**TTTGCT)-3' (ODN2) /cDNA1      (b) 5'-d(GCGTT**B**TTTGCT)-3' (ODN2) /cRNA1

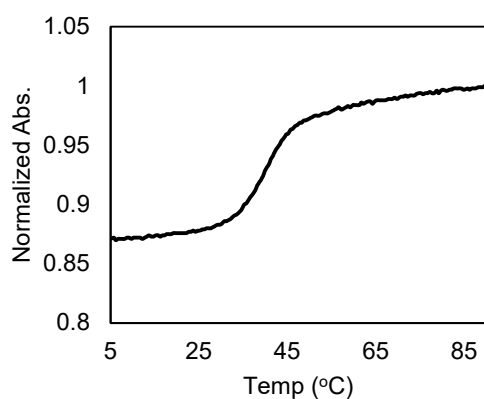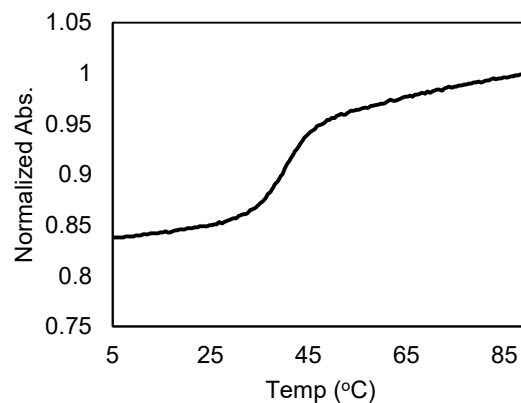

(c) 5'-d(GCGT**B**TBTGCT)-3' (ODN3) /cDNA1      (d) 5'-d(GCGT**B**TBTGCT)-3' (ODN3) /cRNA1

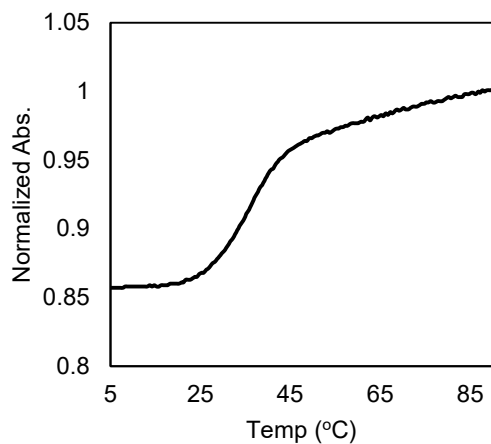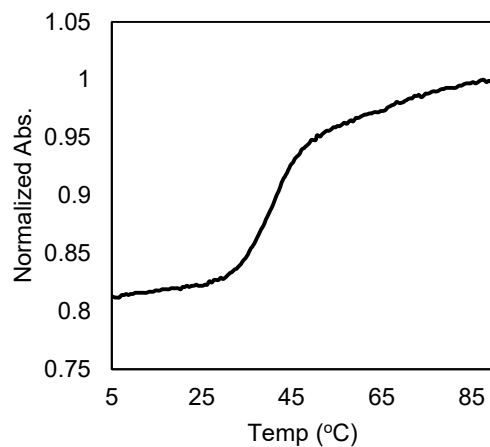

(e) 5'-d(GCGTT**BB**TTGCT)-3' (ODN4) /cDNA1

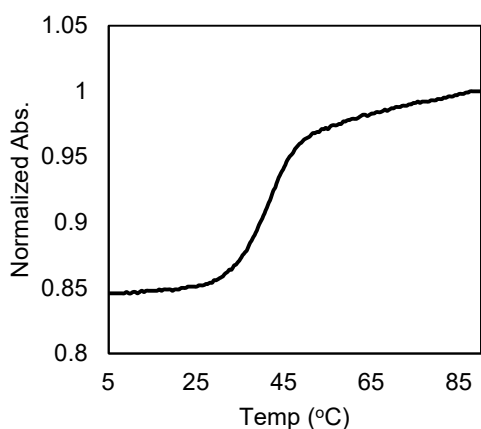

(f) 5'-d(GCGTT**BB**TTGCT)-3' (ODN4) /cRNA1

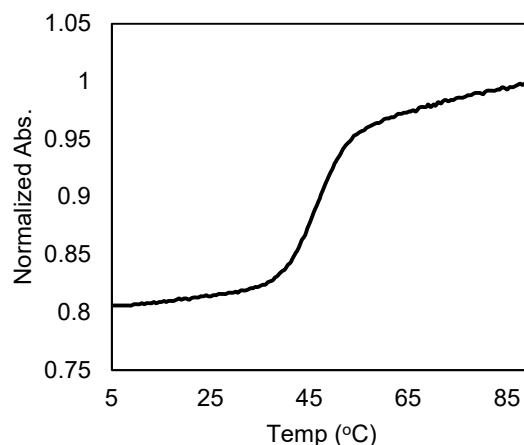

(g) 5'-d(GC**GBTBT**BTGCT)-3' (ODN5) /cDNA1

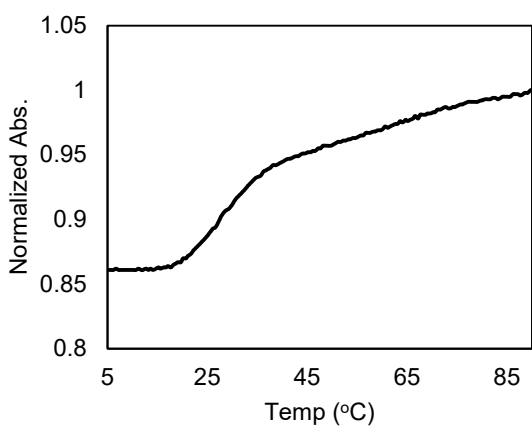

(h) 5'-d(GC**GBTBT**BTGCT)-3' (ODN5) /cRNA1

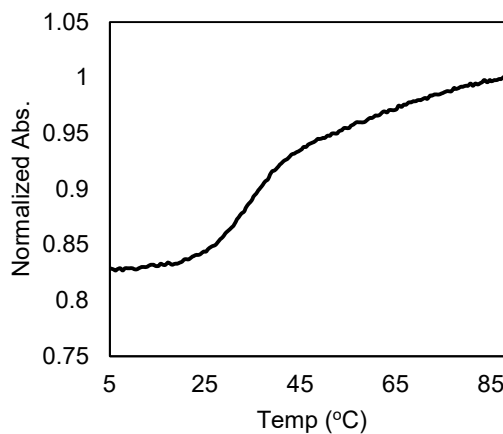

(i) 5'-d(GCGT**BBB**TTGCT)-3' (ODN8) /cDNA1

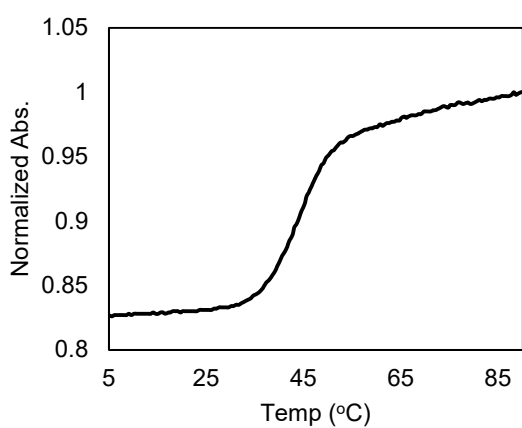

(j) 5'-d(GCGT**BBB**TTGCT)-3' (ODN8) /cRNA1

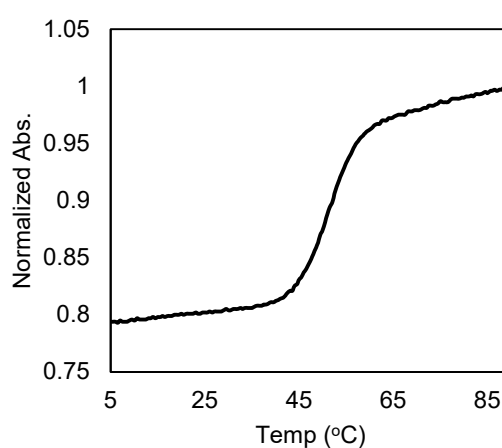

(k) 5'-d(GCGTC**B**ATTGCT)-3' (ODN8) /cDNA2

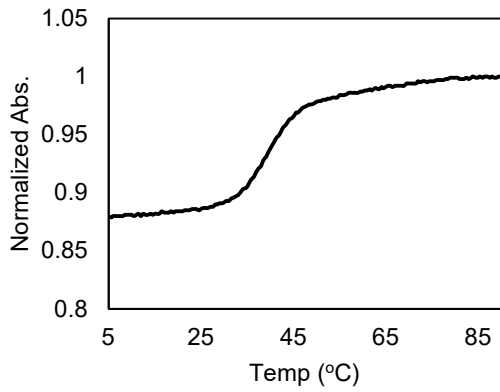

(l) 5'-d(GCGTC**B**ATTGCT)-3' (ODN8) /cRNA2

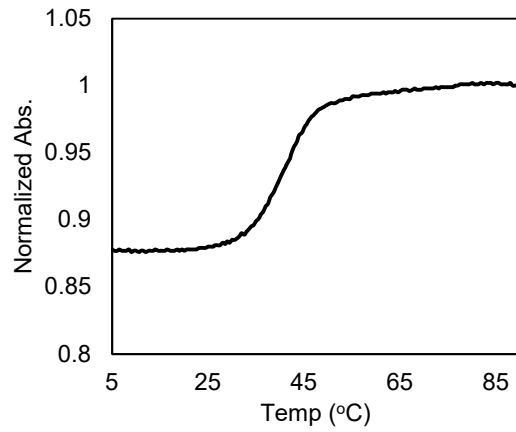

(m) 5'-d(GCGTC**B**CTTGCT)-3' (ODN10) /cDNA3

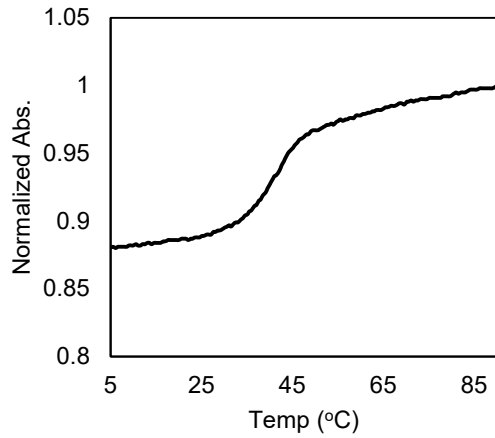

(n) 5'-d(GCGTC**B**CTTGCT)-3' (ODN10) /cRNA3

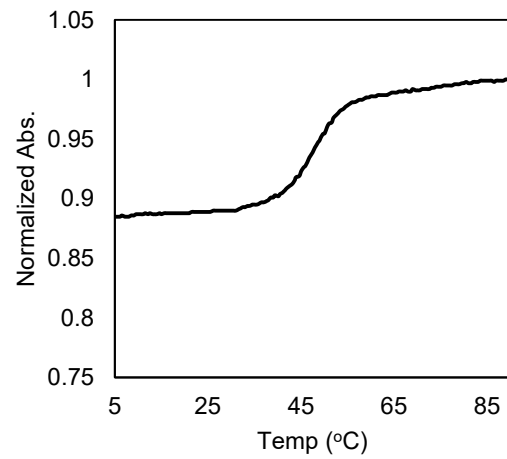

(o) 5'-d(GCGT**A**BATTGCT)-3' (ODN12) /cDNA4

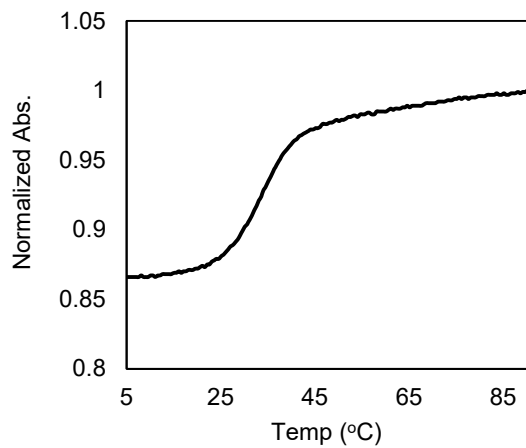

(p) 5'-d(GCGT**A**BATTGCT)-3' (ODN12) /cRNA4

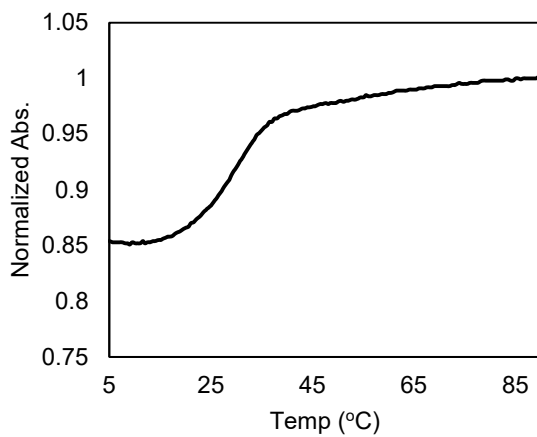

(q) 5'-d(GCGTGBGTTGCT)-3' (ODN14) /cDNA5 (r) d(GCGTGBGTTGCT)-3' (ODN14) /cRNA5

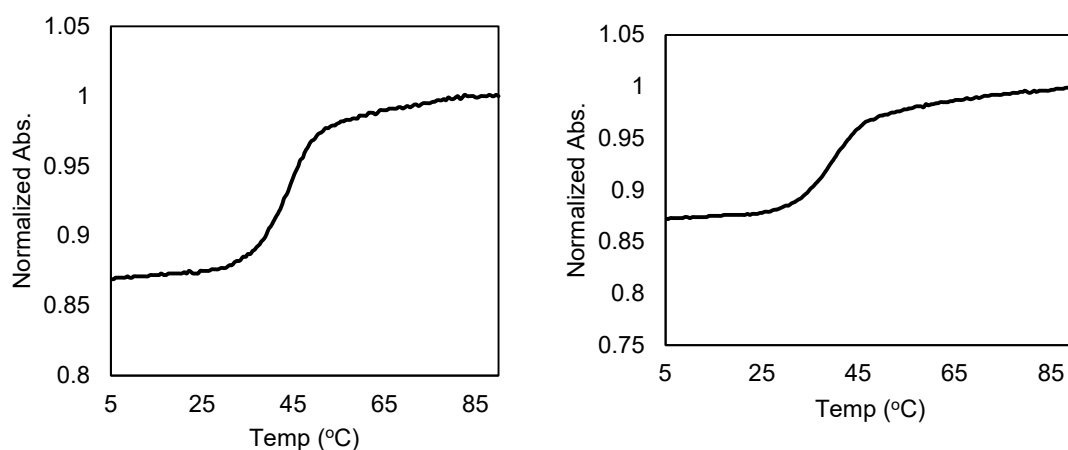

**Fig. S6** UV melting curves for the duplexes containing OBN (**B**) with matched and mismatched base pairs.

(a) 5'-d(GCGTTBTTTGCT)-3' (ODN2) /ssDNA

(b) 5'-d(GCGTTBTTTGCT)-3' (ODN2) /ssRNA

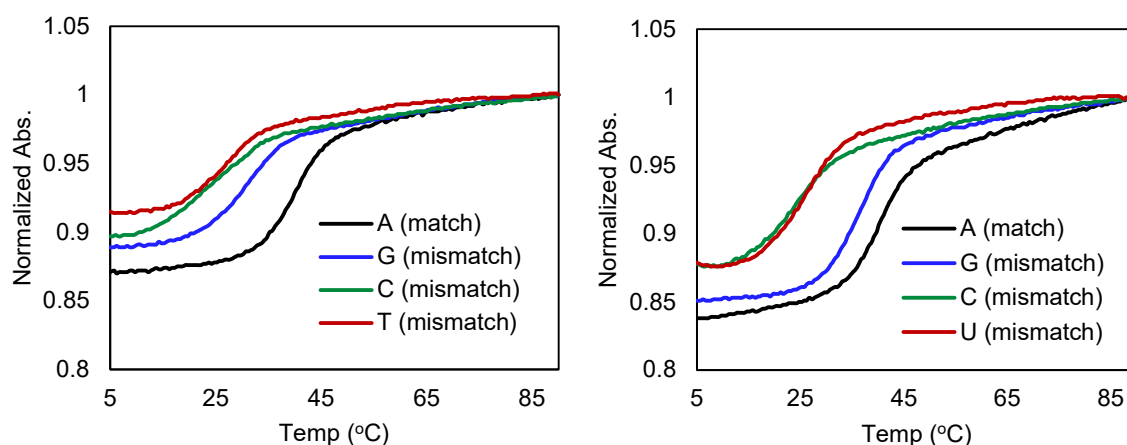

UV melting profiles were measured in 2 mM sodium phosphate buffer (pH 7.2) containing 20 mM NaCl at a scan rate of 0.5°C/min at 260 nm. The concentration of oligonucleotide used was 2  $\mu$ M for each strand. The error in  $T_m$  values was  $\pm 0.5^\circ\text{C}$ .

Sequence: 5'-d(GCGTTBTTTGCT)-3' (ODN2) /3'-(CGCAYAAACGA-5') (Y: A, G, C, and T (or U)).

**B**: OBN.



**Fig. S7** Fluorescent spectrum of OBN-modified ODN2 (5'-d(GCGTTBTTTGCT)-3').

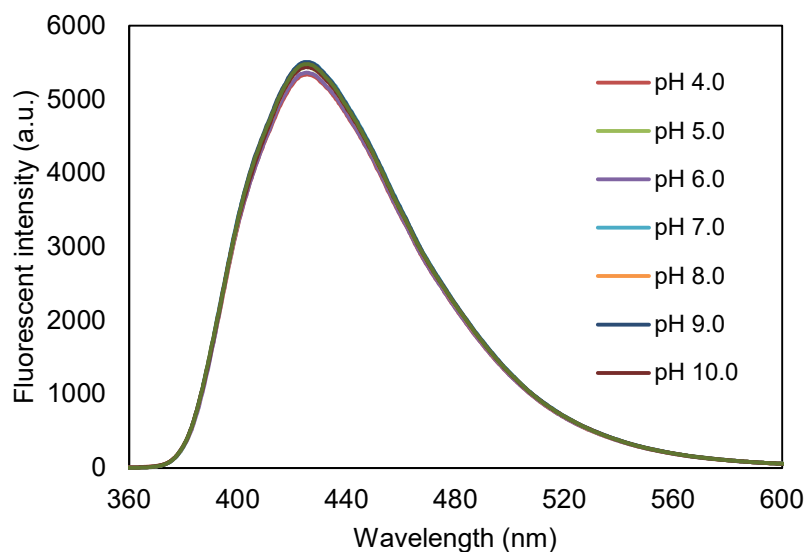

Fluorescent spectrums of ODN2 (4 $\mu$ M) were measured in the 10 mM of citric acid buffer (pH 4.0 and 5.0), 10 mM of phosphate buffer (6.0, 7.0, and 8.0), NaOH-glycine buffer (pH 9.0 and 10.0) at 10 °C. Excited at 335 nm.

**Fig. S8** UV melting curves for the triplexes containing TFO2-8.

UV melting profiles were measured in 7 mM sodium phosphate buffer (pH 7.0 or pH 6.0) containing 140 mM KCl and 10 mM MgCl<sub>2</sub> at a scan rate of 0.5°C/min at 260 nm. The concentration of oligonucleotide used was 1.5  $\mu$ M for each strand. The error in  $T_m$  values was  $\pm 0.5^\circ\text{C}$ . (**B**: OBN, **C**: 2'-deoxy-5-methylcytidine)

(I) Under pH 7.0 conditions

(a) 5'-d(TTTTCT**B**TCTCTCT)-3' (TFO2) /dsDNA (b) 5'-d(TTTT**B**CTTTCTCTCT)-3' (TFO3) /dsDNA

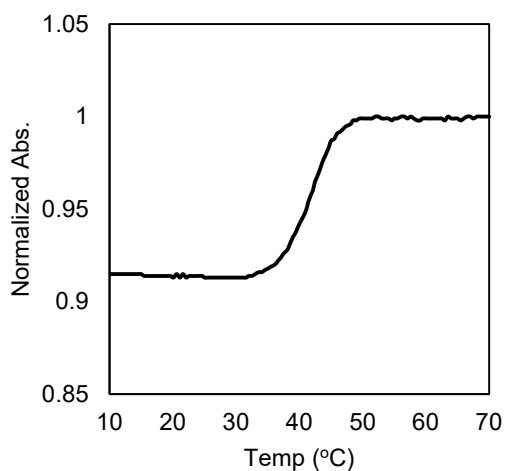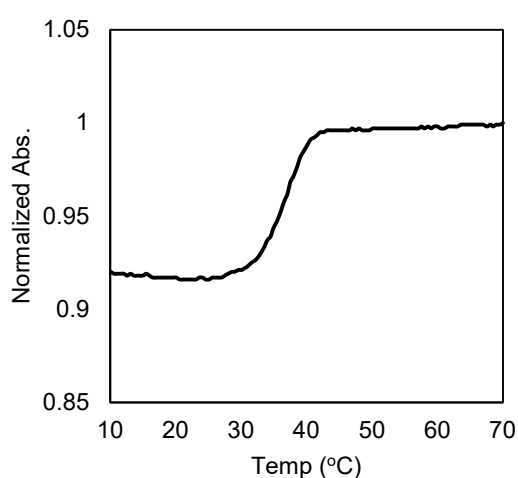

(c) 5'-d(TTTTT**C**BTCTCTCT)-3' (TFO4) /dsDNA (d) 5'-d(TTTT**BC**BTCTCTCT)-3' (TFO5) /dsDNA

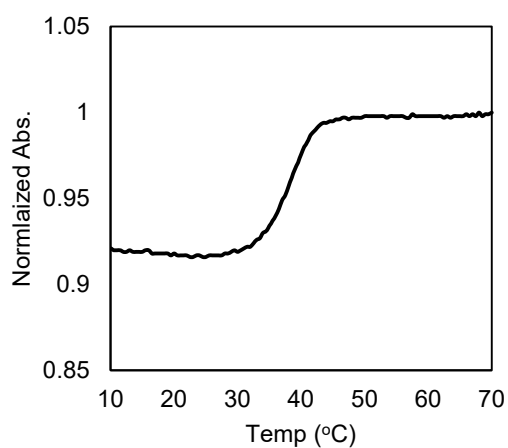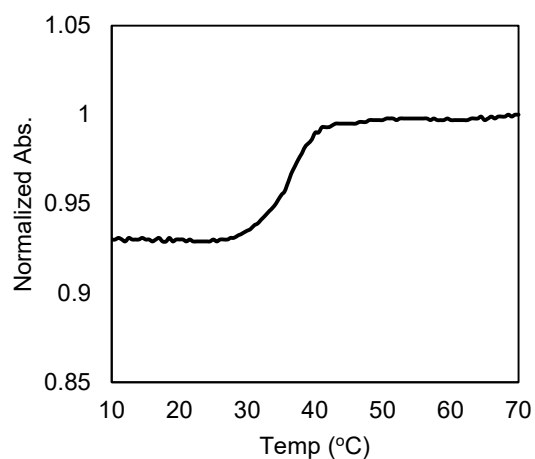

(e) 5'-d(TTTT**BCTT**BCTCTCT)-3' (TFO6) /dsDNA (f) 5'-d(TTTTT**CB**BTCTCTCT)-3' (TFO7) /dsDNA

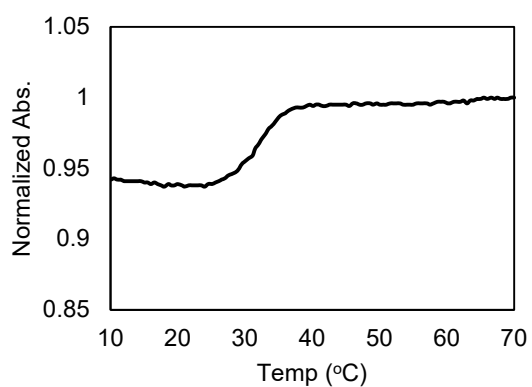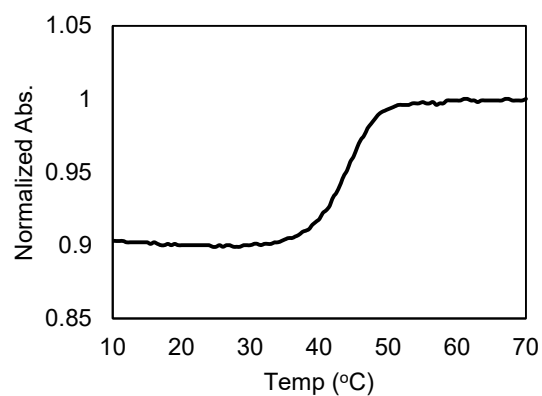

(g) 5'-d(TTTTT**CB**BBCTCTCT)-3' (TFO8) /dsDNA

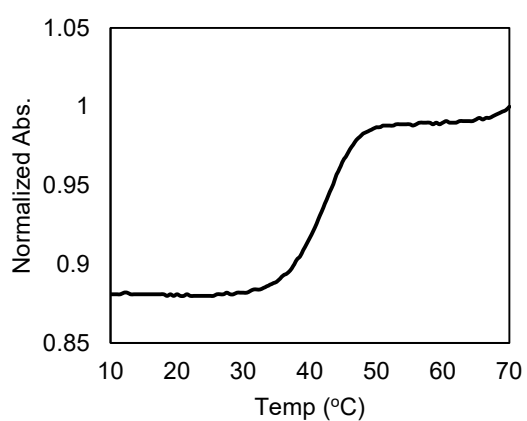

(II) Under pH 6.0 conditions

(a) 5'-d(TTTTTCT**B**TCTCTCT)-3' (TFO2) /dsDNA (b) 5'-d(TTTT**B**CTTTCTCTCT)-3' (TFO3) /dsDNA

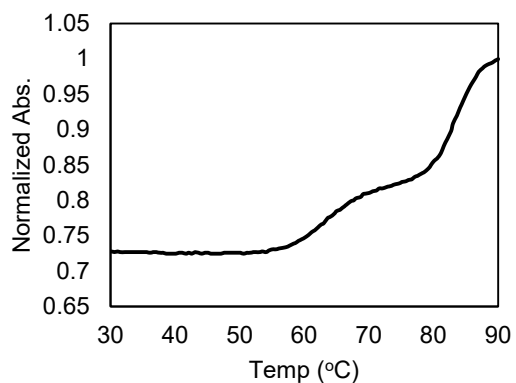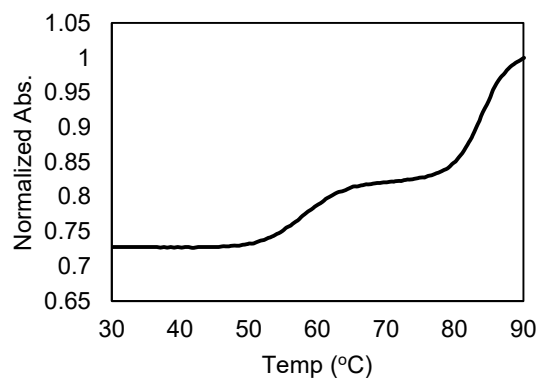

(c) 5'-d(TTTTTCT**B**TTCTCTCT)-3' (TFO4) /dsDNA (d) 5'-d(TTTT**B**CTTCTCTCT)-3' (TFO5) /dsDNA

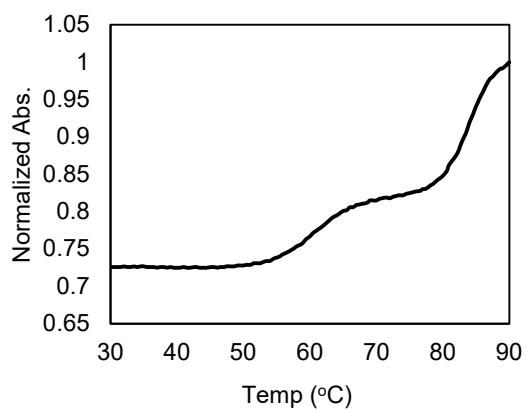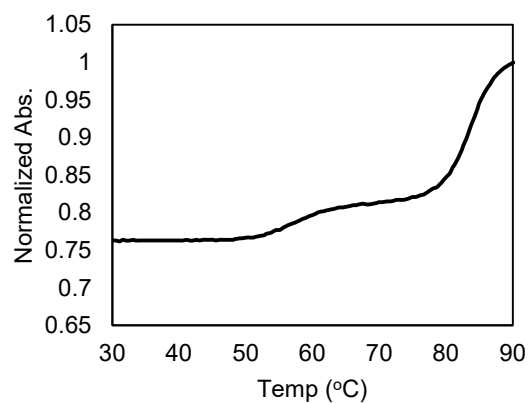

(e) 5'-d(TTTT**B**CTT**B**CTCTCT)-3' (TFO6) /dsDNA (f) 5'-d(TTTTTCT**B**BTCTCTCT)-3' (TFO7) /dsDNA

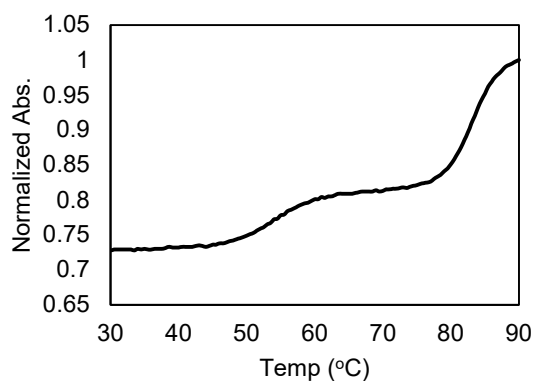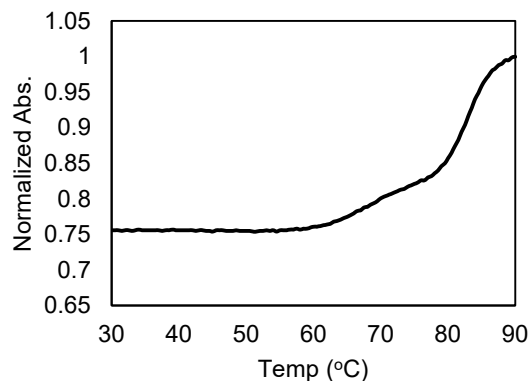

(g) 5'-d(TTTTTTBBBCTCTCT)-3' (TFO8) /dsDNA

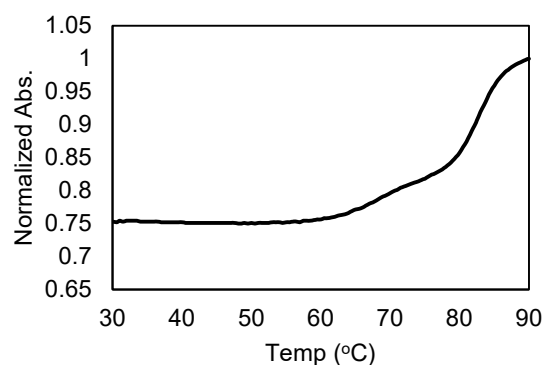

**Fig. S9** Snapshots of molecular dynamics (MD) calculation of OBN-modified ODN/dsDNA.

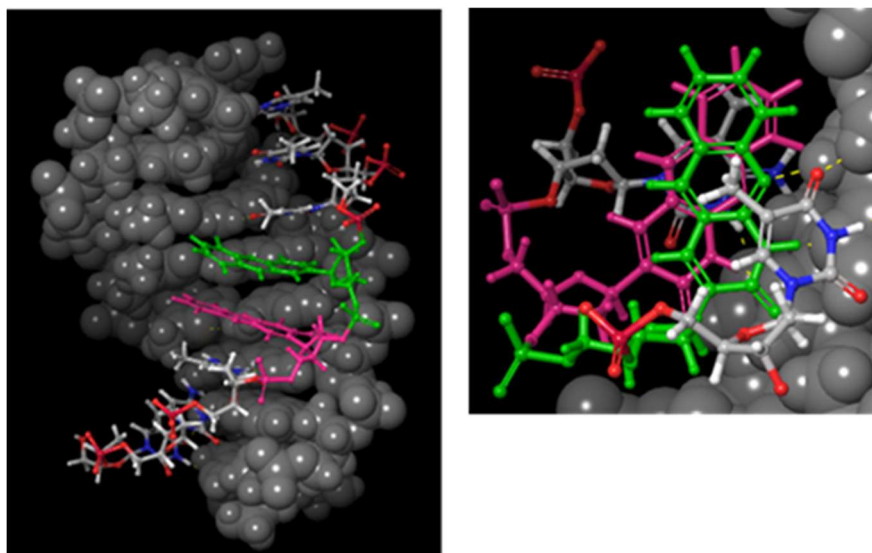

MD calculation was conducted by MacroModel software [Schrödinger, LLC]; OPLS3 force field (in water at 300 K for 2.0 ns). The initial structure was constructed with 1D3X [PDB ID: 1D3X<sup>1</sup>]. The sequence of TFO is 5'-d(TCCB<sub>1</sub>B<sub>2</sub>TTT)-3'. The sequences of target dsDNA are 5'-d(AGGAAAAA)-3' and 3'-d(TCCTTTTT)-5'. Purple: **B<sub>1</sub>** (= OBN) at 5'-adjacent of another OBN (= **B<sub>2</sub>**). Green: **B<sub>2</sub>** (= OBN) at 5'-adjacent of thymidine. C: 2'-deoxy-5-methylcytidine. Gray dsDNA is shown as space-filling model.

**Fig. S10** Hysteresis of sigmoidal curve in TFO/dsDNA

UV melting profiles were measured in 7 mM sodium phosphate buffer (pH 6.0) containing 140 mM KCl and 10 mM MgCl<sub>2</sub> at a scan rate of 0.2°C/min or 0.5°C/min at 260 nm. The concentration of oligonucleotide used was 1.5 μM for each strand. The error in  $T_m$  values was ±0.5°C. Plain; sigmoidal curve with cooling, dashed; sigmoidal curve with heating. (**B**: OBN, **C**: 2'-deoxy-5-methylcytidine)

(I) Ramp rate: 0.2°C/min

(a) 5'-d(TTTTTCTTTTCTCTCT)-3' (TFO1) /dsDNA (b) 5'-d(TTTTTCTBTCTCTCT)-3' (TFO2) /dsDNA

$T_m$ : 61 °C (with heating), 60 °C (with cooling)

$T_m$ : 63°C (with heating), 63°C (with cooling)

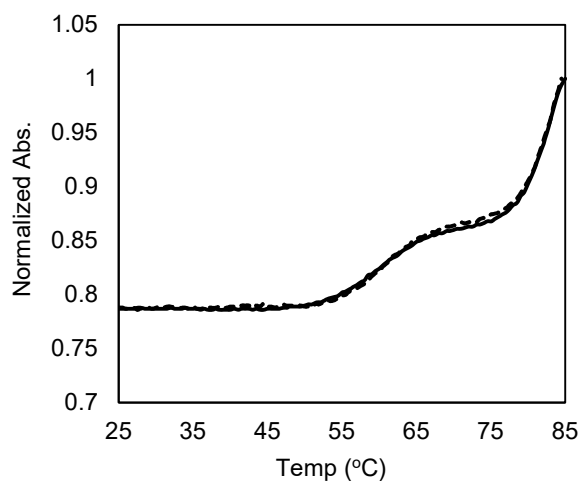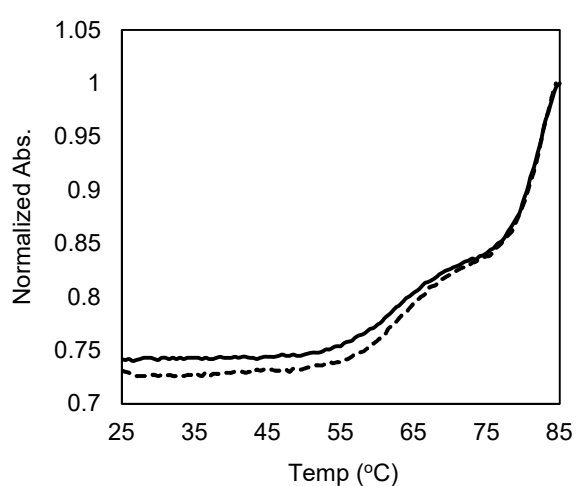

(c) 5'-d(TTTTTCBBTCTCTCT)-3' (TFO7) /dsDNA

$T_m$ : 67 °C (with heating), 67 °C (with cooling)

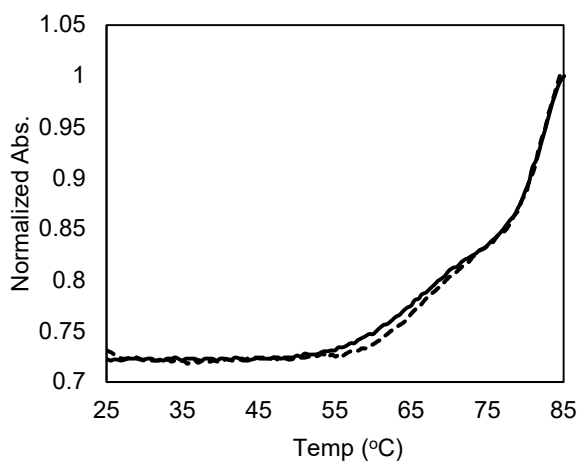

(II) Ramp rate: 0.5°C/min

(a) 5'-d(TTTTTC~~T~~TTTCTCTCT)-3' (TFO1) /dsDNA

$T_m$ : 62 °C (with heating), 61 °C (with cooling)

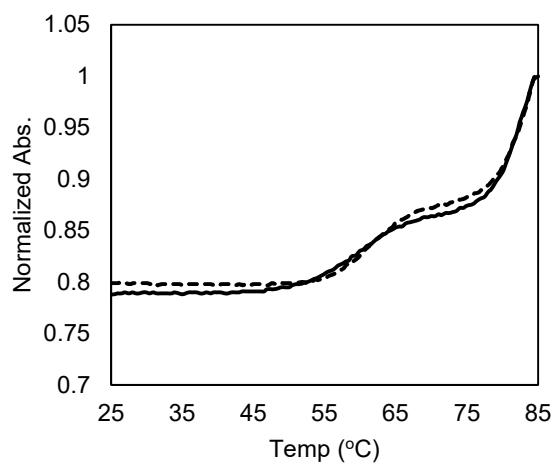

(b) 5'-d(TTTTTC~~T~~BTCTCTCT)-3' (TFO2) /dsDNA

$T_m$ : 64 °C (with heating), 63 °C (with cooling)

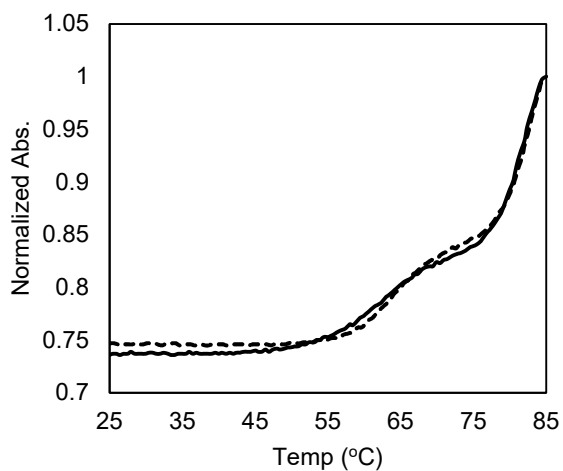

(C) 5'-d(TTTTTC~~T~~BBTCTCTCT)-3' (TFO7) /dsDNA

$T_m$ : 67 °C (with heating), 64 °C (with cooling)

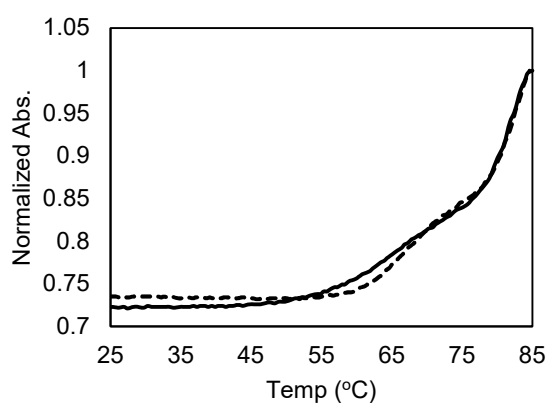

## Reference

1) M. Tarkcy, A. K. Phipps, P. Schultze, J. Feigon, *Biochemistry*, 1998, **37**, 5810-5819.
